# Supplementary material for: A highly efficient heterogeneous copper-catalyzed cascade reaction of 2-halobenzoic acids and amidines leading to quinazolinones
Source: Royal Society of Chemistry journal article supplement (doi:10.1039/c4ra09379h), 2014-10-01
Supplement: c4ra09379h1.pdf [file c4ra09379h1.pdf]

## Supporting information:

### A highly efficient heterogeneous copper-catalyzed cascade reaction of 2-halobenzoic acids and amidines leading to quinazolinones

Wen He<sup>a</sup>, Hong Zhao<sup>b\*</sup>, Ruiya Yao<sup>a</sup> and Mingzhong Cai<sup>a\*</sup>

<sup>a</sup> Key Laboratory of Functional Small Organic Molecule, Ministry of Education and College of Chemistry & Chemical Engineering, Jiangxi Normal University, Nanchang 330022, P. R. China

<sup>b</sup> School of Chemistry and Chemical Engineering, Guangdong Pharmaceutical University, Guangzhou 510006, P. R. China

Fax: (+86)-791-8812-0388; E-mail: mzcai@jxnu.edu.cn; zhaohong1001@sina.com

#### The spectral data of quinazolinone derivatives 3a-3y:

**2-Methylquinazolin-4(3H)-one 3a.** White solid, mp 237-239 °C (lit.<sup>1</sup> 238-240 °C).

<sup>1</sup>H NMR (400 MHz, DMSO-d<sub>6</sub>): δ = 12.10 (br, 1H), 8.08 (d, *J* = 8.0 Hz, 1H), 7.76 (t, *J* = 7.6 Hz, 1H), 7.57 (d, *J* = 8.0 Hz, 1H), 7.44 (t, *J* = 7.4 Hz, 1H), 2.36 (s, 3H) ppm.

<sup>13</sup>C NMR (100 MHz, DMSO-d<sub>6</sub>): δ = 161.7, 154.2, 148.9, 134.2, 126.5, 125.8, 125.6, 120.6, 21.4 ppm.

**2-Phenylquinazolin-4(3H)-one 3b.** White solid, mp 237-238 °C (lit.<sup>1</sup> 236-237 °C).

<sup>1</sup>H NMR (400 MHz, DMSO-d<sub>6</sub>): δ = 12.54 (br, 1H), 8.19-8.12 (m, 3H), 7.84-7.72 (m, 2H), 7.57-7.47 (m, 4H) ppm. <sup>13</sup>C NMR (100 MHz, DMSO-d<sub>6</sub>): δ = 162.2, 152.3, 148.7, 134.5, 132.7, 131.3, 128.6, 127.7, 127.5, 126.5, 125.8, 121.0 ppm.

**2-Cyclopropylquinazolin-4(3H)-one 3c.** White solid, mp 232-233 °C (lit.<sup>1</sup> 233-235 °C). <sup>1</sup>H NMR (400 MHz, DMSO-d<sub>6</sub>): δ = 12.44 (br, 1H), 8.03 (d, *J* = 8.0 Hz, 1H), 7.70 (t, *J* = 7.6 Hz, 1H), 7.45 (d, *J* = 8.0 Hz, 1H), 7.37 (t, *J* = 7.4 Hz, 1H), 1.97-1.92 (m, 1H), 1.10-1.00 (m, 4H) ppm. <sup>13</sup>C NMR (100 MHz, DMSO-d<sub>6</sub>): δ = 161.6, 159.0, 149.1, 134.2, 126.4, 125.7, 125.2, 120.6, 13.4, 9.0 ppm.

**2-(*tert*-Butyl)quinazolin-4(3H)-one 3d.** White solid, mp 207-209 °C (lit.<sup>2</sup> 206-208 °C). <sup>1</sup>H NMR (400 MHz, DMSO-d<sub>6</sub>): δ = 11.95 (br, 1H), 8.13 (d, *J* = 7.6 Hz, 1H), 7.79 (t, *J* = 7.2 Hz, 1H), 7.65 (d, *J* = 8.0 Hz, 1H), 7.50 (t, *J* = 7.6 Hz, 1H), 1.38 (s, 9H) ppm. <sup>13</sup>C NMR (100 MHz, DMSO-d<sub>6</sub>): δ = 162.6, 162.3, 148.3, 134.2, 127.3, 126.1, 125.5, 120.6, 37.2, 27.8 ppm.

**2-(*p*-Tolyl)quinazolin-4(3H)-one 3e.** White solid, mp 260-262 °C (lit.<sup>2</sup> 261-263 °C). <sup>1</sup>H NMR (400 MHz, DMSO-d<sub>6</sub>): δ = 12.49 (br, 1H), 8.15 (d, *J* = 8.0 Hz, 1H), 8.10 (d, *J* = 7.6 Hz, 2H), 7.82 (t, *J* = 7.4 Hz, 1H), 7.72 (d, *J* = 7.6 Hz, 1H), 7.50 (t, *J* = 7.0 Hz, 1H), 7.34 (d, *J* = 7.2 Hz, 2H), 2.38 (s, 3H) ppm. <sup>13</sup>C NMR (100 MHz, DMSO-d<sub>6</sub>): δ = 162.2, 152.2, 148.8, 141.4, 134.5, 129.9, 129.1, 127.6, 127.4, 126.3, 125.8, 120.9, 20.9 ppm.

**6-Chloro-2-methylquinazolin-4(3H)-one 3f.** White solid, mp 295-297 °C (lit.<sup>1</sup> 294-296 °C). <sup>1</sup>H NMR (400 MHz, DMSO-d<sub>6</sub>): δ = 12.37 (br, 1H), 7.95 (d, *J* = 2.0 Hz, 1H), 7.74 (t, *J* = 8.4 Hz, 1H), 7.55 (d, *J* = 8.4 Hz, 1H), 2.32 (s, 3H) ppm. <sup>13</sup>C NMR (100 MHz, DMSO-d<sub>6</sub>): δ = 160.7, 154.9, 147.6, 134.3, 130.0, 128.8, 124.6, 121.8, 21.4 ppm.

**6-Chloro-2-phenylquinazolin-4(3H)-one 3g.** White solid, mp 287-289 °C (lit.<sup>1</sup> 286-

288 °C). <sup>1</sup>H NMR (400 MHz, DMSO-d<sub>6</sub>): δ = 12.72 (br, 1H), 8.18 (d, *J* = 7.2 Hz, 2H), 8.09 (d, *J* = 2.0 Hz, 1H), 7.88-7.84 (m, 1H), 7.77 (d, *J* = 8.8 Hz, 1H), 7.61-7.54 (m, 3H) ppm. <sup>13</sup>C NMR (100 MHz, DMSO-d<sub>6</sub>): δ = 161.3, 152.8, 147.5, 134.7, 132.4, 131.6, 130.7, 129.7, 128.6, 127.8, 126.0, 122.2 ppm.

**6-Chloro-2-cyclopropylquinazolin-4(3H)-one 3h.** White solid, mp 292-294 °C (lit.<sup>1</sup> 294-296 °C). <sup>1</sup>H NMR (400 MHz, DMSO-d<sub>6</sub>): δ = 12.61 (br, 1H), 7.97 (d, *J* = 2.4 Hz, 1H), 7.73 (d, *J* = 8.8 Hz, 1H), 7.49 (d, *J* = 8.8 Hz, 1H), 1.99-1.95 (m, 1H), 1.10-1.04 (m, 4H) ppm. <sup>13</sup>C NMR (100 MHz, DMSO-d<sub>6</sub>): δ = 160.6, 159.7, 147.8, 134.3, 129.4, 128.7, 124.7, 121.8, 13.5, 9.6 ppm.

**2-(*tert*-Butyl)-6-chloroquinazolin-4(3H)-one 3i.** White solid, mp 256-258 °C. <sup>1</sup>H NMR (400 MHz, DMSO-d<sub>6</sub>): δ = 12.14 (br, 1H), 8.06 (d, *J* = 2.0 Hz, 1H), 7.84 (dd, *J* = 8.8, 2.4 Hz, 1H), 7.67 (d, *J* = 8.8 Hz, 1H), 1.38 (s, 9H) ppm. <sup>13</sup>C NMR (100 MHz, DMSO-d<sub>6</sub>): δ = 163.3, 161.3, 147.0, 134.4, 130.4, 129.5, 124.6, 121.9, 37.3, 27.7 ppm. Anal. Calcd. for C<sub>12</sub>H<sub>13</sub>N<sub>2</sub>OCl: C, 60.90; H, 5.54; N, 11.83. Found: C, 60.68; H, 5.38; N, 11.65.

**6-Chloro-2-(*p*-tolyl)quinazolin-4(3H)-one 3j.** White solid, mp 300-302 °C (lit.<sup>3</sup> 302-304 °C). <sup>1</sup>H NMR (400 MHz, DMSO-d<sub>6</sub>): δ = 12.61 (br, 1H), 8.08 (d, *J* = 8.0 Hz, 2H), 8.06 (d, *J* = 2.0 Hz, 1H), 7.85-7.82 (m, 1H), 7.74 (d, *J* = 8.8 Hz, 1H), 7.35 (d, *J* = 8.0 Hz, 2H), 2.39 (s, 3H) ppm. <sup>13</sup>C NMR (100 MHz, DMSO-d<sub>6</sub>): δ = 161.3, 152.8, 147.6, 141.7, 134.6, 130.6, 129.6, 129.2, 127.7, 125.9, 124.8, 122.1, 20.9 ppm.

**2-Methyl-6-nitroquinazolin-4(3H)-one 3k.** Light yellow solid, mp 291-293 °C (lit.<sup>1</sup> 293-295 °C). <sup>1</sup>H NMR (400 MHz, DMSO-d<sub>6</sub>): δ = 12.69 (br, 1H), 8.68 (s, 1H), 8.43

(d,  $J = 8.8$  Hz, 1H), 7.67 (d,  $J = 9.2$  Hz, 1H), 2.37 (s, 3H) ppm.  $^{13}\text{C}$  NMR (100 MHz, DMSO- $d_6$ ):  $\delta = 160.8, 158.5, 153.1, 144.3, 128.3, 128.1, 121.8, 120.6, 21.7$  ppm.

**6-Nitro-2-phenylquinazolin-4(3H)-one 3l.** Light yellow solid, mp 295-297 °C (lit.<sup>1</sup> 297-299 °C).  $^1\text{H}$  NMR (400 MHz, DMSO- $d_6$ ):  $\delta = 13.01$  (br, 1H), 8.82 (s, 1H), 8.55 (d,  $J = 8.8$  Hz, 1H), 8.22 (d,  $J = 7.6$  Hz, 2H), 7.90 (d,  $J = 8.8$  Hz, 1H), 7.67-7.57 (m, 3H) ppm.  $^{13}\text{C}$  NMR (100 MHz, DMSO- $d_6$ ):  $\delta = 162.1, 156.2, 153.5, 145.2, 132.7, 132.5, 129.7, 129.2, 129.0, 128.7, 122.5, 121.5$  ppm.

**2-Cyclopropyl-6-nitroquinazolin-4(3H)-one 3m.** Light yellow solid, mp 291-293 °C (lit.<sup>1</sup> 290-292 °C).  $^1\text{H}$  NMR (400 MHz, DMSO- $d_6$ ):  $\delta = 12.89$  (br, 1H), 8.68 (d,  $J = 2.8$  Hz, 1H), 8.38 (dd,  $J = 9.2, 2.8$  Hz, 1H), 7.57 (d,  $J = 9.2$  Hz, 1H), 2.01-1.95 (m, 1H), 1.16-1.07 (m, 4H) ppm.  $^{13}\text{C}$  NMR (100 MHz, DMSO- $d_6$ ):  $\delta = 163.4, 160.7, 153.5, 143.7, 128.2, 128.0, 122.0, 120.4, 13.9, 10.5$  ppm.

**2-(tert-Butyl)-6-nitroquinazolin-4(3H)-one 3n.** Light yellow solid, mp 263-265 °C.  $^1\text{H}$  NMR (400 MHz, DMSO- $d_6$ ):  $\delta = 12.31$  (br, 1H), 8.68 (d,  $J = 2.4$  Hz, 1H), 8.41 (dd,  $J = 9.2, 2.8$  Hz, 1H), 7.71 (d,  $J = 9.2$  Hz, 1H), 1.36 (s, 9H) ppm.  $^{13}\text{C}$  NMR (100 MHz, DMSO- $d_6$ ):  $\delta = 166.6, 161.5, 152.5, 144.5, 129.0, 128.1, 121.7, 120.6, 37.7, 27.6$  ppm. Anal. Calcd. for  $\text{C}_{12}\text{H}_{13}\text{N}_3\text{O}_3$ : C, 58.30; H, 5.30; N, 16.99. Found: C, 58.49; H, 5.12; N, 16.78.

**6-Nitro-2-(p-tolyl)quinazolin-4(3H)-one 3o.** Light yellow solid, mp 301-303 °C (lit.<sup>4</sup> 304-305 °C).  $^1\text{H}$  NMR (400 MHz, DMSO- $d_6$ ):  $\delta = 12.92$  (br, 1H), 8.80 (s, 1H), 8.52 (d,  $J = 8.8$  Hz, 1H), 8.11 (d,  $J = 7.6$  Hz, 2H), 7.89 (d,  $J = 8.8$  Hz, 1H), 7.36 (d,  $J = 7.6$  Hz, 2H), 2.38 (s, 3H) ppm.  $^{13}\text{C}$  NMR (100 MHz, DMSO- $d_6$ ):  $\delta = 162.0, 156.0, 153.6,$

145.1, 143.1, 129.8, 129.7, 129.6, 128.9, 128.7, 122.5, 121.4, 21.5 ppm.

**6-Fluoro-2-phenylquinazolin-4(3H)-one 3p.** White solid, mp 282-284 °C (lit.<sup>5</sup> 280-282 °C). <sup>1</sup>H NMR (400 MHz, DMSO-d<sub>6</sub>): δ = 12.60 (br, 1H), 8.22-8.16 (m, 3H), 7.61-7.33 (m, 5H) ppm. <sup>13</sup>C NMR (100 MHz, DMSO-d<sub>6</sub>): δ = 165.8 (d, <sup>1</sup>J<sub>C-F</sub> = 249.4 Hz), 161.5, 153.7, 150.8 (d, <sup>3</sup>J<sub>C-F</sub> = 14.2 Hz), 132.4, 131.6, 128.9 (d, <sup>3</sup>J<sub>C-F</sub> = 10.9 Hz), 128.5, 127.8, 118.0, 115.0 (d, <sup>2</sup>J<sub>C-F</sub> = 23.4 Hz), 122.4 (d, <sup>2</sup>J<sub>C-F</sub> = 20.9 Hz) ppm.

**2-Cyclopropyl-6-fluoroquinazolin-4(3H)-one 3q.** White solid, mp 252-253 °C (lit.<sup>6</sup> 253-254 °C). <sup>1</sup>H NMR (400 MHz, DMSO-d<sub>6</sub>): δ = 12.51 (br, 1H), 8.13-8.09 (m, 1H), 7.27-7.21 (m, 2H), 2.01-1.95 (m, 1H), 1.14-1.05 (m, 4H) ppm. <sup>13</sup>C NMR (100 MHz, DMSO-d<sub>6</sub>): δ = 165.7 (d, <sup>1</sup>J<sub>C-F</sub> = 248.7 Hz), 160.8, 160.6, 151.3 (d, <sup>3</sup>J<sub>C-F</sub> = 13.3 Hz), 128.8 (d, <sup>3</sup>J<sub>C-F</sub> = 10.9 Hz), 117.6, 113.7 (d, <sup>2</sup>J<sub>C-F</sub> = 23.4 Hz), 113.3 (d, <sup>2</sup>J<sub>C-F</sub> = 21.4 Hz), 13.4, 9.7 ppm.

**2-(tert-Butyl)-6-fluoroquinazolin-4(3H)-one 3r.** White solid, mp 222-224 °C. <sup>1</sup>H NMR (400 MHz, DMSO-d<sub>6</sub>): δ = 11.96 (br, 1H), 8.15-8.12 (m, 1H), 7.37-7.31 (m, 2H), 1.34 (s, 9H) ppm. <sup>13</sup>C NMR (100 MHz, DMSO-d<sub>6</sub>): δ = 166.2 (d, <sup>1</sup>J<sub>C-F</sub> = 249.2 Hz), 164.7, 162.0, 151.0 (d, <sup>3</sup>J<sub>C-F</sub> = 13.1 Hz), 129.1 (d, <sup>3</sup>J<sub>C-F</sub> = 10.9 Hz), 118.1, 115.2 (d, <sup>2</sup>J<sub>C-F</sub> = 23.4 Hz), 112.7 (d, <sup>2</sup>J<sub>C-F</sub> = 21.3 Hz), 37.8, 28.2 ppm. Anal. Calcd. for C<sub>12</sub>H<sub>13</sub>N<sub>2</sub>OF: C, 65.44; H, 5.95; N, 12.71. Found: C, 65.18; H, 5.73; N, 12.58.

**6-Fluoro-2-(p-tolyl)quinazolin-4(3H)-one 3s.** White solid, mp 301-303 °C. <sup>1</sup>H NMR (400 MHz, DMSO-d<sub>6</sub>): δ = 12.53 (br, 1H), 8.22-8.17 (m, 1H), 8.09 (d, *J* = 8.0 Hz, 2H), 7.49-7.34 (m, 4H), 2.40 (s, 3H) ppm. <sup>13</sup>C NMR (100 MHz, DMSO-d<sub>6</sub>): δ = 165.8 (d, <sup>1</sup>J<sub>C-F</sub> = 249.5 Hz), 161.5, 153.6, 150.9 (d, <sup>3</sup>J<sub>C-F</sub> = 13.0 Hz), 131.7, 131.4, 129.2,

128.9 (d,  $^3J_{C-F} = 10.6$  Hz), 127.8, 117.9, 114.8 (d,  $^2J_{C-F} = 23.3$  Hz), 112.2 (d,  $^2J_{C-F} = 23.6$  Hz), 20.9 ppm. Anal. Calcd. for  $C_{15}H_{11}N_2OF$ : C, 70.86; H, 4.36; N, 11.01. Found: C, 70.59; H, 4.55; N, 10.87.

**6-Methyl-2-phenylquinazolin-4(3H)-one 3t.** White solid, mp 236-238 °C (lit.<sup>2</sup> 238-240 °C).  $^1H$  NMR (400 MHz, DMSO- $d_6$ ):  $\delta = 12.46$  (br, 1H), 8.16 (d,  $J = 7.2$  Hz, 2H), 7.94 (s, 1H), 7.63-7.52 (m, 5H), 2.44 (s, 3H) ppm.  $^{13}C$  NMR (100 MHz, DMSO- $d_6$ ):  $\delta = 162.1, 151.4, 146.7, 136.3, 135.8, 132.8, 131.2, 128.5, 127.6, 127.3, 125.2, 120.7, 20.8$  ppm.

**2-(tert-Butyl)-6-methylquinazolin-4(3H)-one 3u.** White solid, mp 205-207 °C.  $^1H$  NMR (400 MHz, DMSO- $d_6$ ):  $\delta = 11.79$  (br, 1H), 7.88 (s, 1H), 7.58 (dd,  $J = 8.4, 2.0$  Hz, 1H), 7.51 (d,  $J = 8.0$  Hz, 1H), 2.42 (s, 3H), 1.35 (s, 9H) ppm.  $^{13}C$  NMR (100 MHz, DMSO- $d_6$ ):  $\delta = 167.4, 167.0, 151.6, 140.9, 140.7, 132.4, 130.2, 125.6, 42.3, 33.0, 26.0$  ppm. Anal. Calcd. for  $C_{13}H_{16}N_2O$ : C, 72.20; H, 7.46; N, 12.95. Found: C, 72.38; H, 7.27; N, 12.74.

**6-Methyl-2-(p-tolyl)quinazolin-4(3H)-one 3v.** White solid, mp 269-271 °C (lit.<sup>7</sup> 271-272 °C).  $^1H$  NMR (400 MHz, DMSO- $d_6$ ):  $\delta = 12.37$  (br, 1H), 8.07 (d,  $J = 7.2$  Hz, 2H), 7.93 (s, 1H), 7.63-7.61 (m, 2H), 7.33 (d,  $J = 7.2$  Hz, 2H), 2.44 (s, 3H), 2.37 (s, 3H) ppm.  $^{13}C$  NMR (100 MHz, DMSO- $d_6$ ):  $\delta = 162.1, 151.4, 146.8, 135.8, 131.7, 131.5, 129.1, 128.6, 127.5, 127.3, 125.2, 120.6, 20.9, 20.8$  ppm.

**7-Methyl-2-phenylquinazolin-4(3H)-one 3w.** White solid, mp 238-240 °C (lit.<sup>4</sup> 240-241 °C).  $^1H$  NMR (400 MHz, DMSO- $d_6$ ):  $\delta = 12.41$  (br, 1H), 8.17 (d,  $J = 7.6$  Hz, 2H), 8.03 (d,  $J = 8.0$  Hz, 1H), 7.57-7.51 (m, 4H), 7.32 (d,  $J = 8.0$  Hz, 1H), 2.46 (s, 3H)

ppm.  $^{13}\text{C}$  NMR (100 MHz, DMSO- $d_6$ ):  $\delta$  = 162.1, 152.3, 148.8, 145.0, 132.8, 131.3, 128.6, 128.0, 127.7, 127.1, 125.7, 118.5, 21.3 ppm.

**2-Cyclopropyl-7-methylquinazolin-4(3H)-one 3x.** White solid, mp 235-237 °C.  $^1\text{H}$  NMR (400 MHz, DMSO- $d_6$ ):  $\delta$  = 12.29 (br, 1H), 7.92 (d,  $J$  = 8.0 Hz, 1H), 7.27 (s, 1H), 7.19 (d,  $J$  = 8.0 Hz, 1H), 2.39 (s, 3H), 1.99-1.92 (m, 1H), 1.08-0.99 (m, 4H) ppm.  $^{13}\text{C}$  NMR (100 MHz, DMSO- $d_6$ ):  $\delta$  = 161.5, 158.9, 149.2, 144.6, 126.6, 126.1, 125.6, 118.2, 21.2, 13.3, 9.3 ppm. Anal. Calcd. for  $\text{C}_{12}\text{H}_{12}\text{N}_2\text{O}$ : C, 71.98; H, 6.04; N, 13.98. Found: C, 71.74; H, 5.87; N, 13.79.

**2-(tert-Butyl)-7-methylquinazolin-4(3H)-one 3y.** White solid, mp 208-210 °C.  $^1\text{H}$  NMR (400 MHz, DMSO- $d_6$ ):  $\delta$  = 11.75 (br, 1H), 7.96 (d,  $J$  = 7.6 Hz, 1H), 7.42 (s, 1H), 7.27 (d,  $J$  = 8.0 Hz, 1H), 2.42 (s, 3H), 1.33 (s, 9H) ppm.  $^{13}\text{C}$  NMR (100 MHz, DMSO- $d_6$ ):  $\delta$  = 167.4, 166.9, 153.2, 149.4, 132.3, 131.7, 130.2, 123.0, 41.9, 32.5, 26.0 ppm. Anal. Calcd. for  $\text{C}_{13}\text{H}_{16}\text{N}_2\text{O}$ : C, 72.20; H, 7.46; N, 12.95. Found: C, 71.97; H, 7.21; N, 12.79.

## References

- 1 X. Liu, H. Fu, Y. Jiang and Y. Zhao, *Angew. Chem. Int. Ed.*, 2009, **48**, 348-351.
- 2 X. Zhang, D. Ye, H. Sun, D. Guo, J. Wang, H. He, Z. Xu, H. Jiang and H. Liu, *Green Chem.*, 2009, **11**, 1881-1888.
- 3 A. S. El-Azab, M. A. Al-Omar, A. A.-M. Abdel-Aziz, N. I. Abdel-Aziz, M. A.-A. El-Sayed, A. M. Aleisa, M. M. Sayed-Ahmed and S. G. Abdel-Hamide, *Eur. J. Med. Chem.*, 2010, **45**, 4188-4198.
- 4 W. Xu, Y. B. Jin, H. X. Liu, Y. Y. Jiang and H. Fu, *Org. Lett.*, 2011, **13**, 1274-1277.
- 5 M.-J. Hour, J.-S. Yang, T.-L. Chen, K.-T. Chen, S.-C. Kuo, J.-G. Chung, C.-C. Lu,

- C.-Y. Chen and Y.-H. Chuang, *Eur. J. Med. Chem.*, 2011, **46**, 2709-2722.
- 6 L. Yu, M. Wang, P. Li and L. Wang, *Appl. Organometal. Chem.*, 2012, **26**, 576-582.
- 7 W. D. Dean and E. P. Papadopoulos, *J. Heterocycl. Chem.*, 1982, **19**, 171-176.

**<sup>1</sup>H NMR and <sup>13</sup>C NMR spectra of compounds 3a-3y.**



新建文件夹  
h-11-20

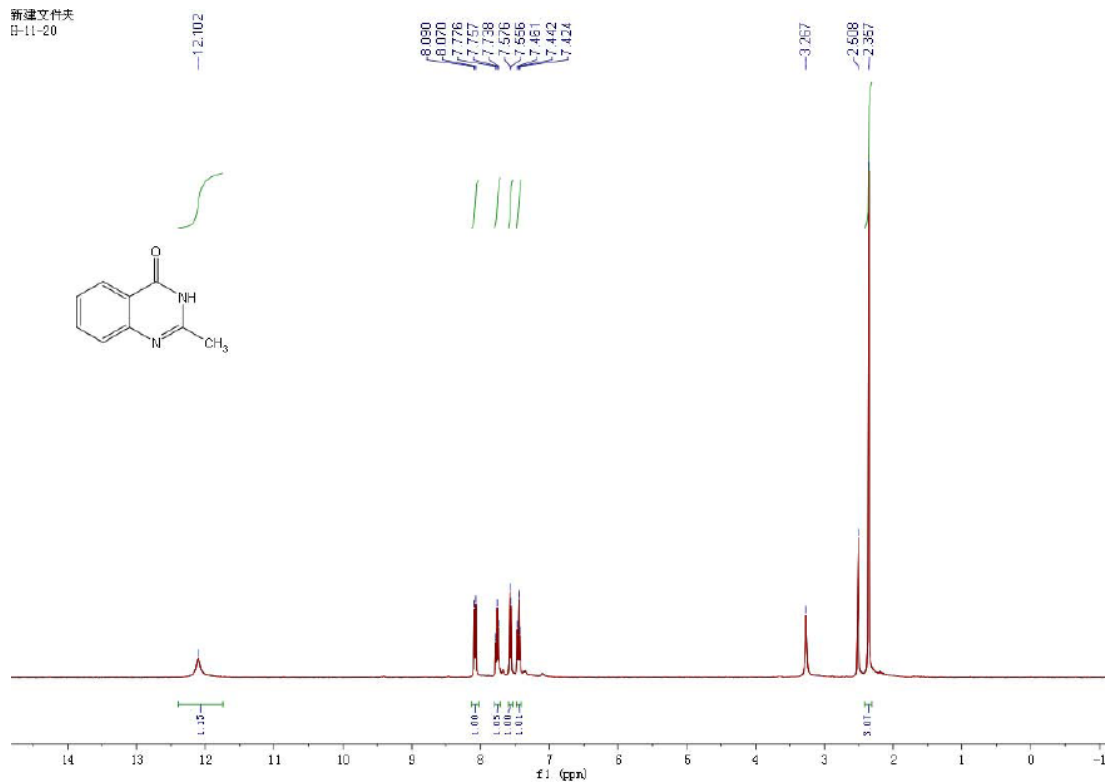

h-11-20

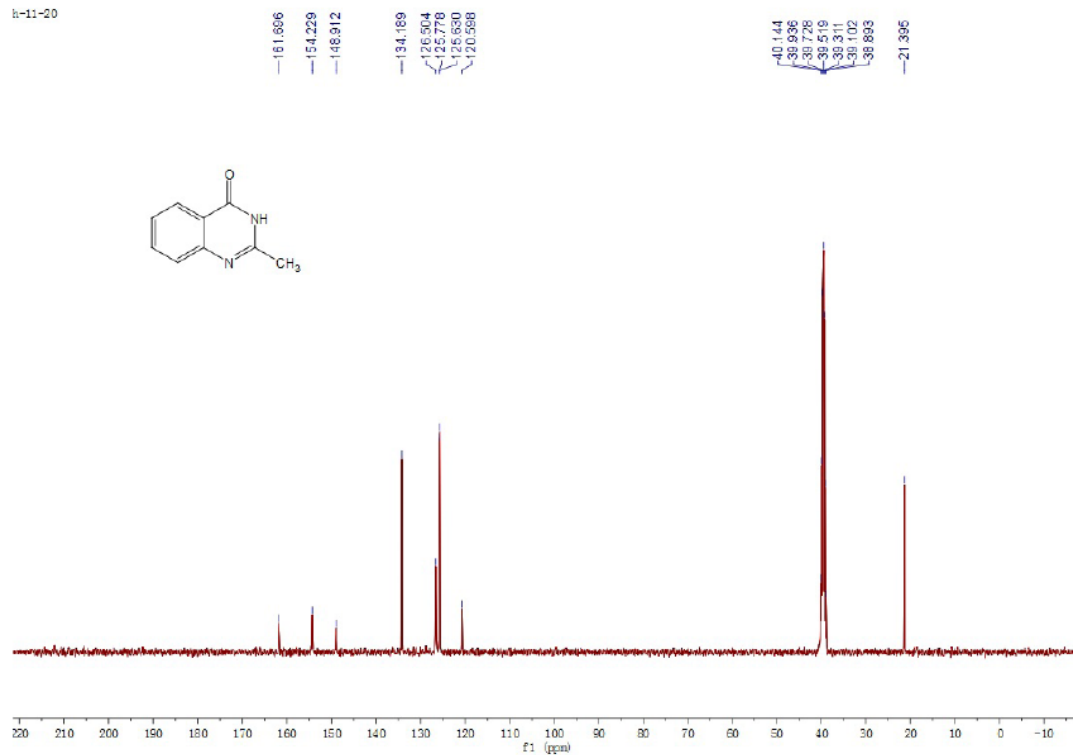

<sup>1</sup>H NMR and <sup>13</sup>C NMR spectra of compound 3a

新建文件夹  
H-12-2

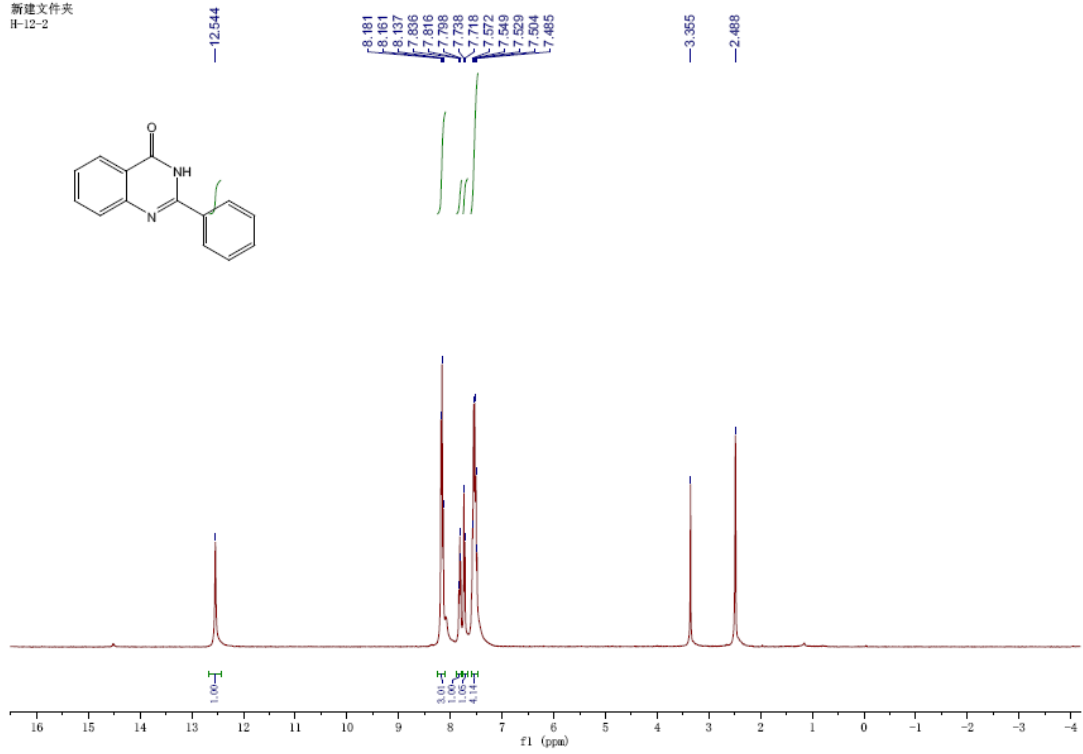

h-12-2

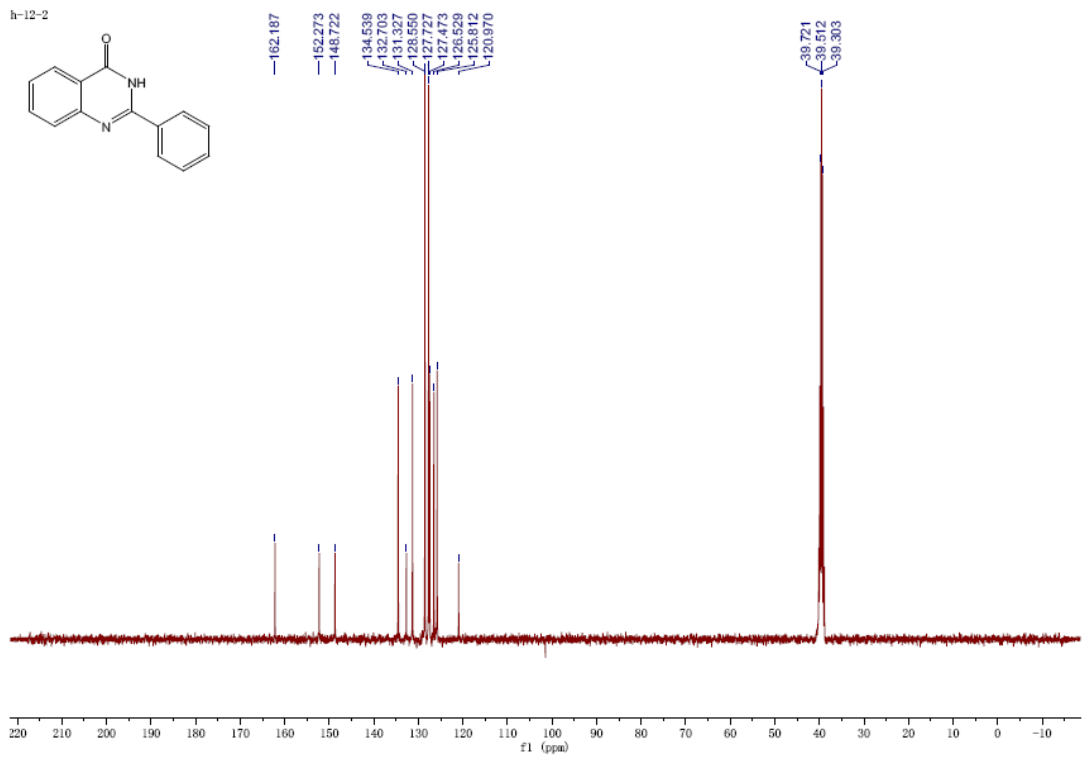

$^1\text{H}$  NMR and  $^{13}\text{C}$  NMR spectra of compound **3b**

新建文件夹  
H-12-3

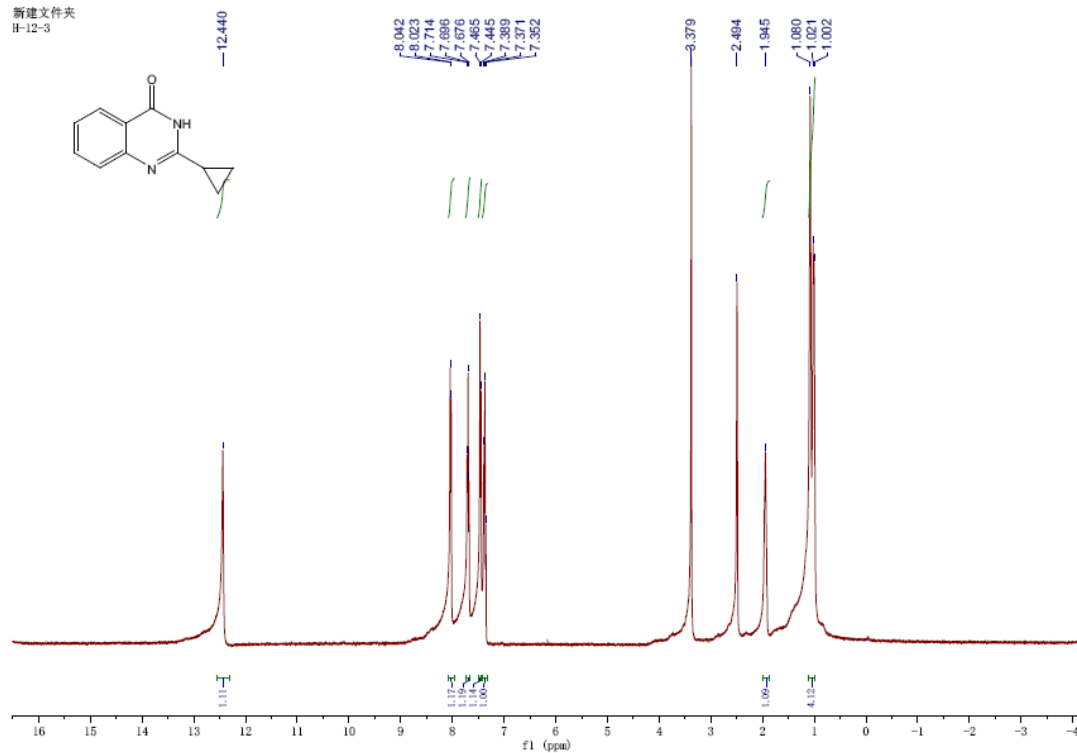

h-12-3

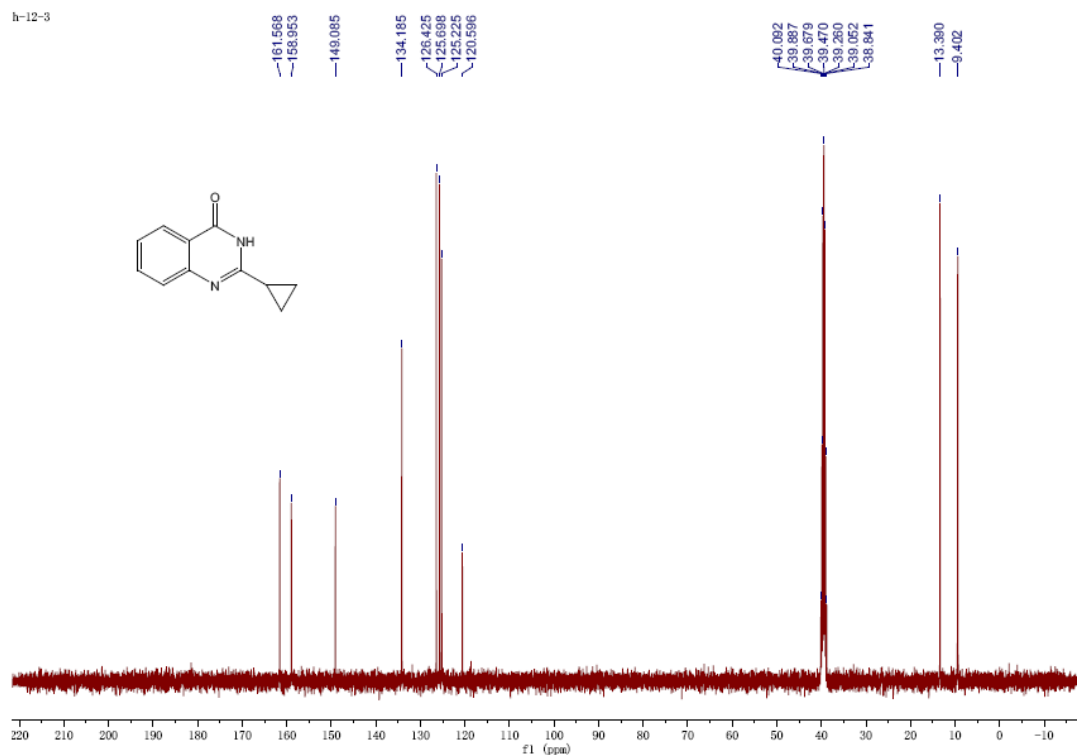

$^1\text{H}$  NMR and  $^{13}\text{C}$  NMR spectra of compound 3c

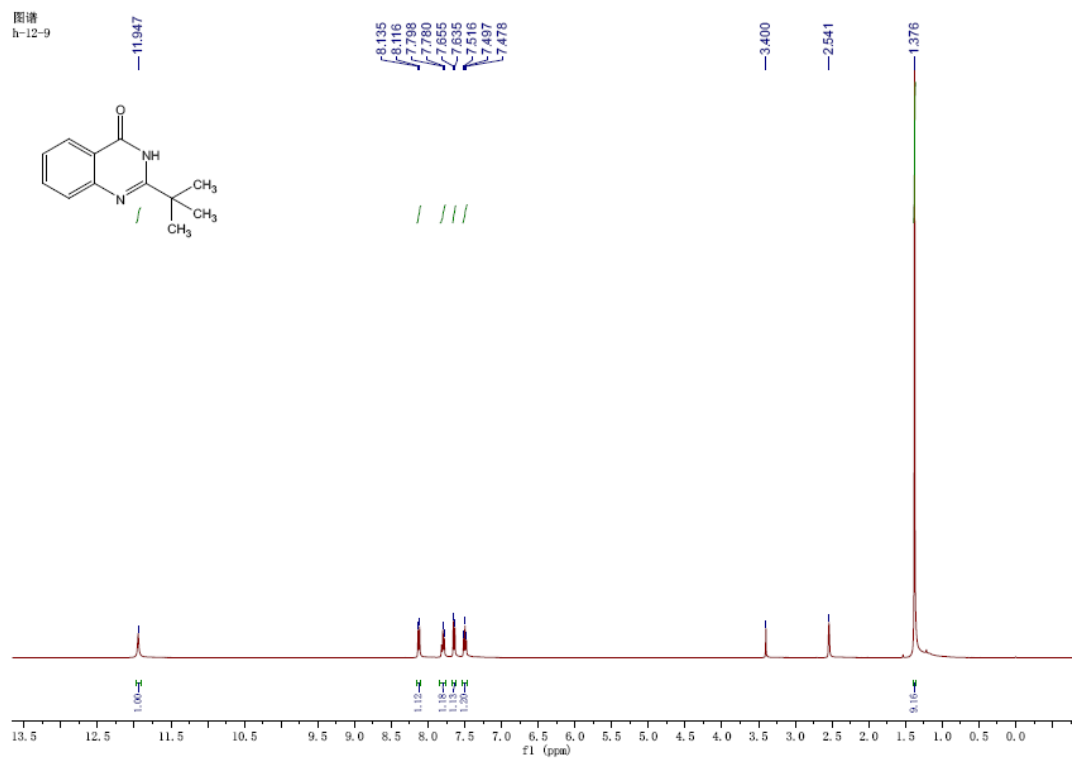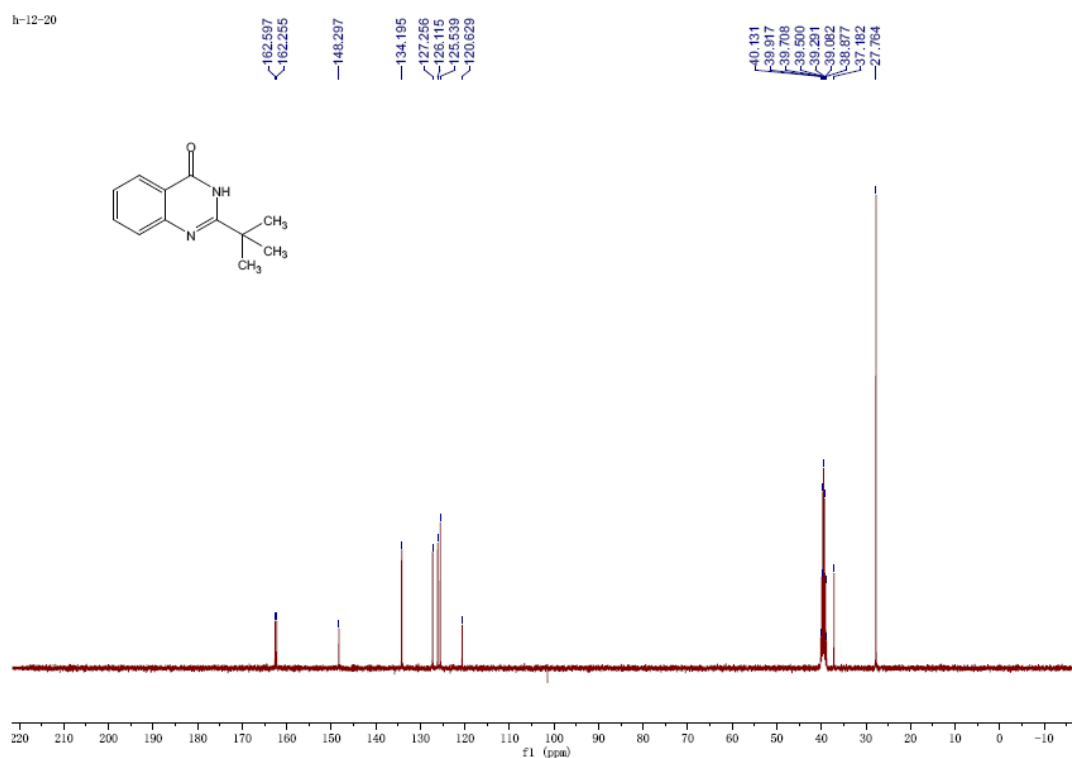

$^1\text{H}$  NMR and  $^{13}\text{C}$  NMR spectra of compound **3d**

07何文  
H-12-25

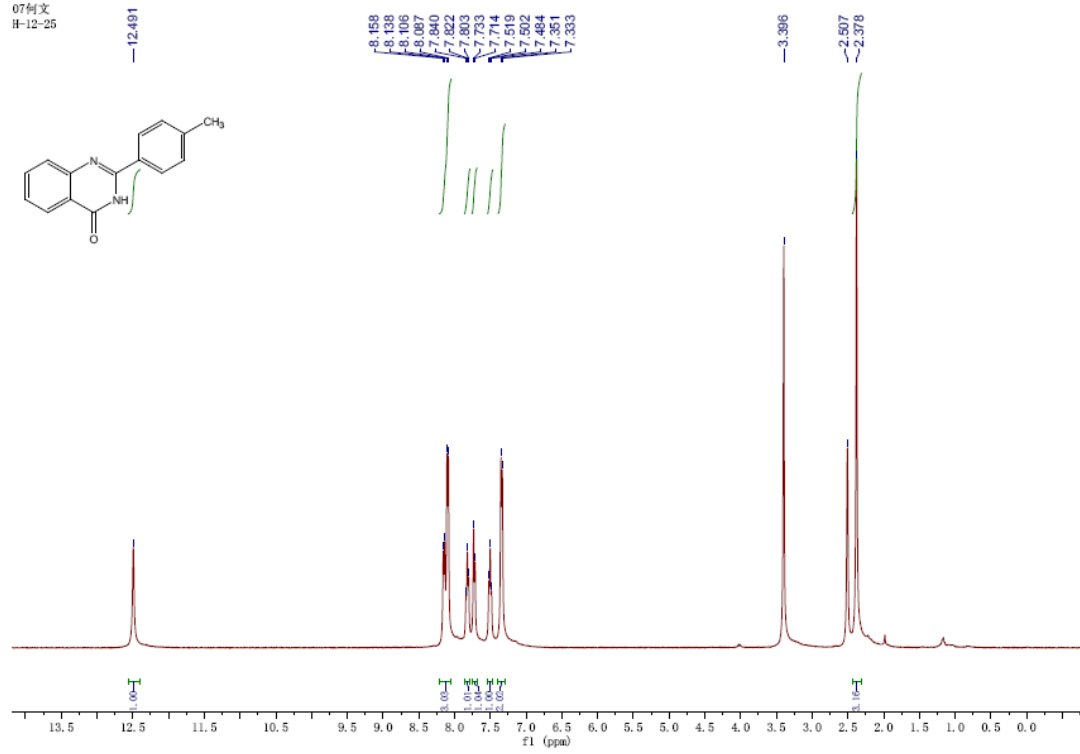

h-12-25

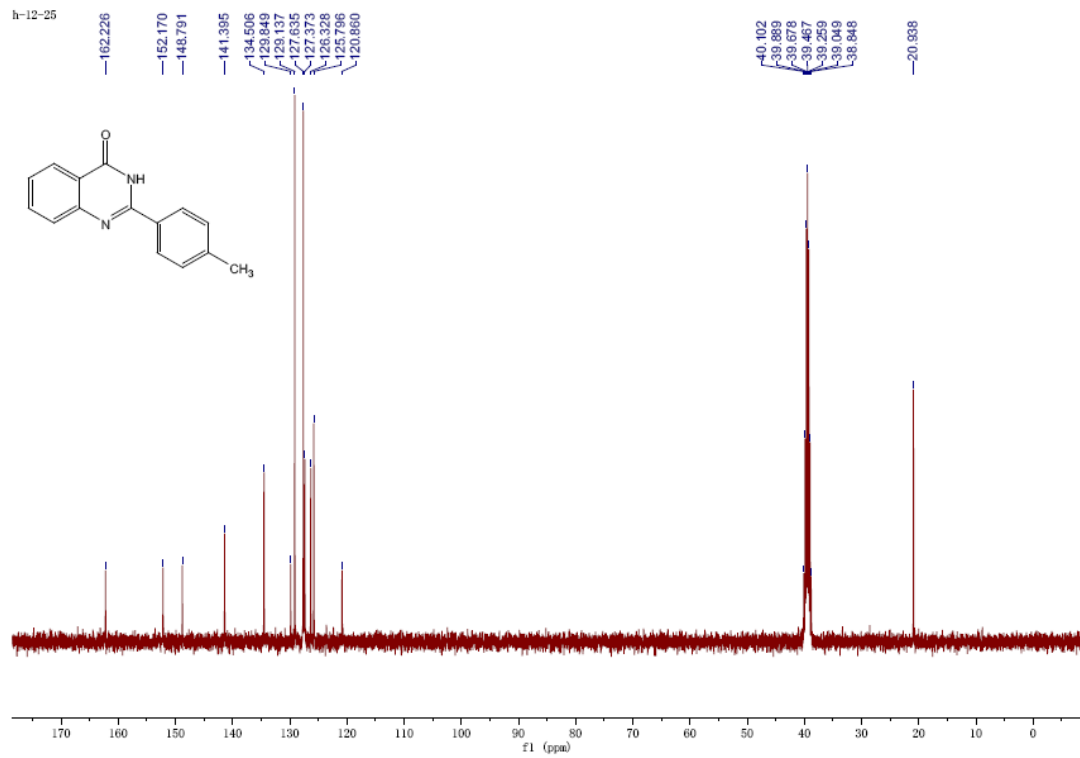

<sup>1</sup>H NMR and <sup>13</sup>C NMR spectra of compound 3e

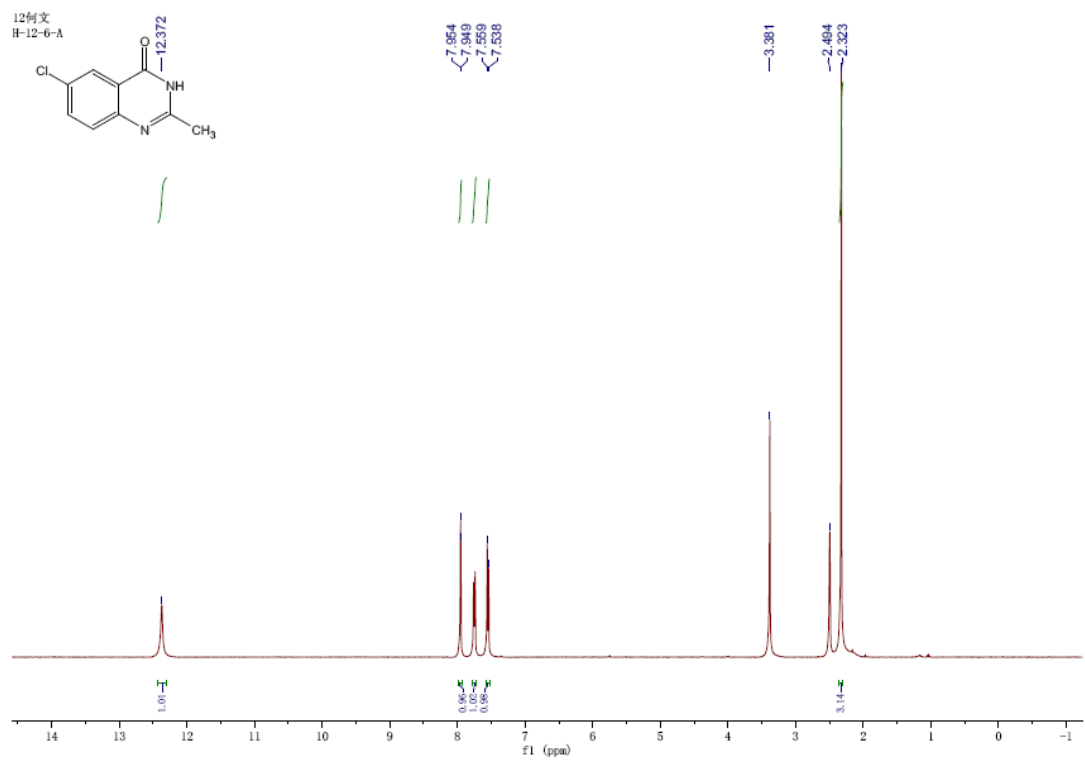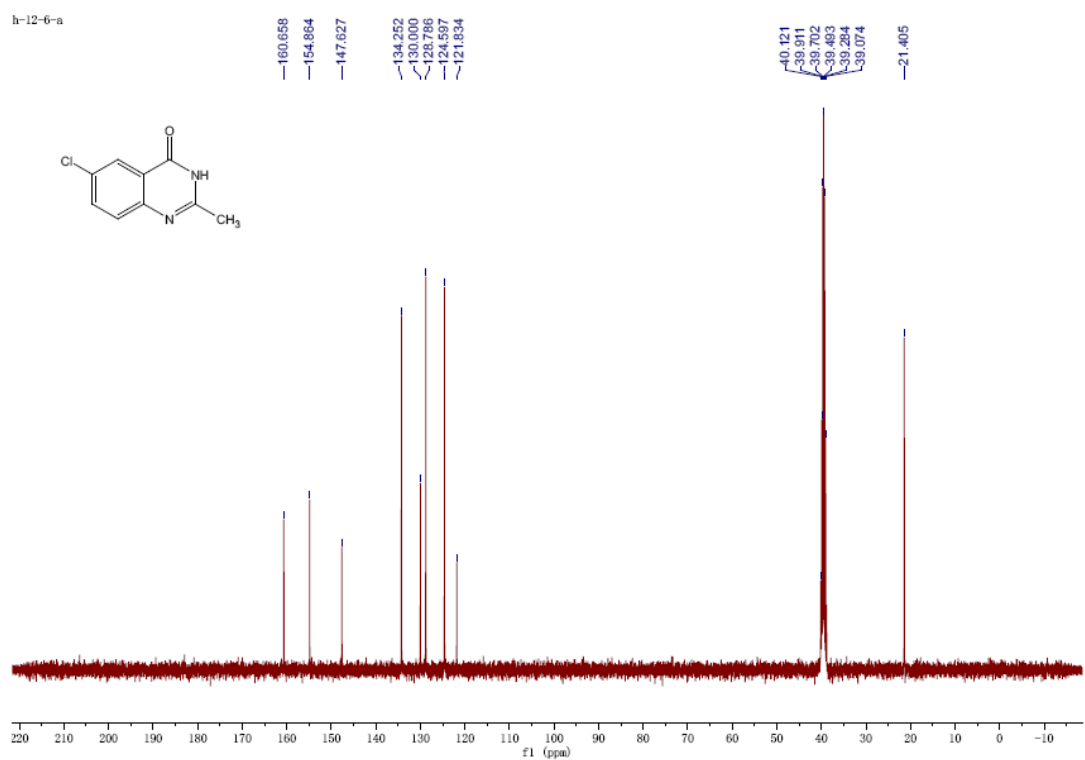

<sup>1</sup>H NMR and <sup>13</sup>C NMR spectra of compound **3f**



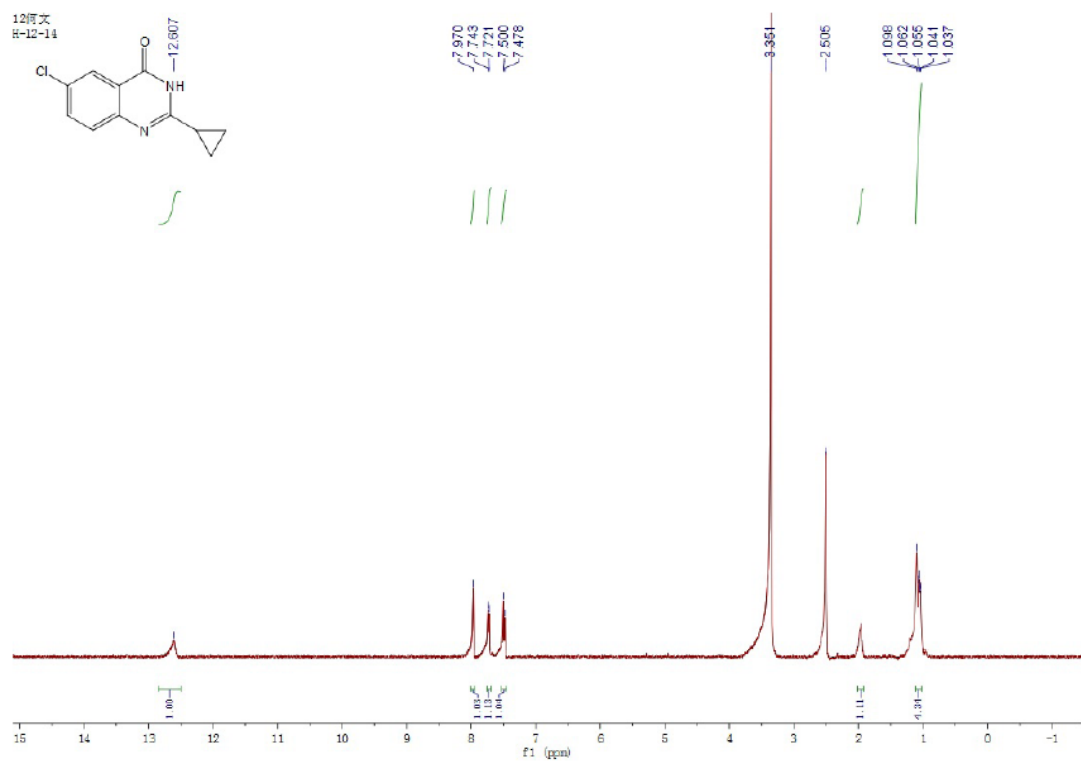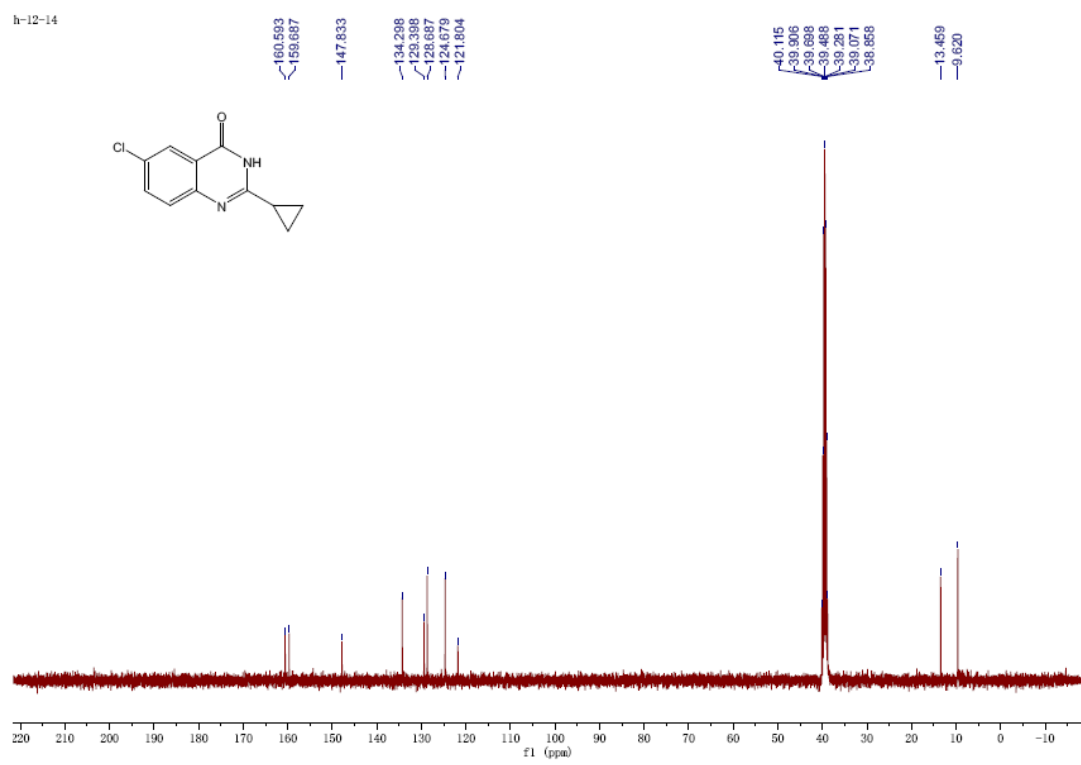

$^1\text{H}$  NMR and  $^{13}\text{C}$  NMR spectra of compound **3h**



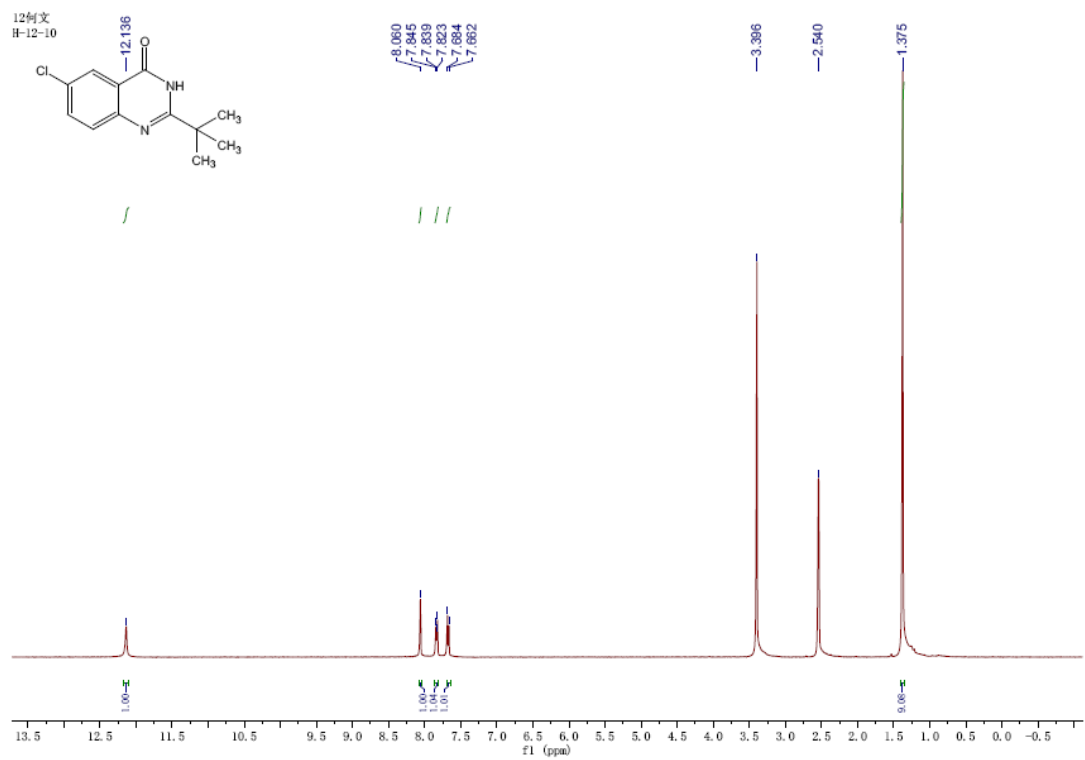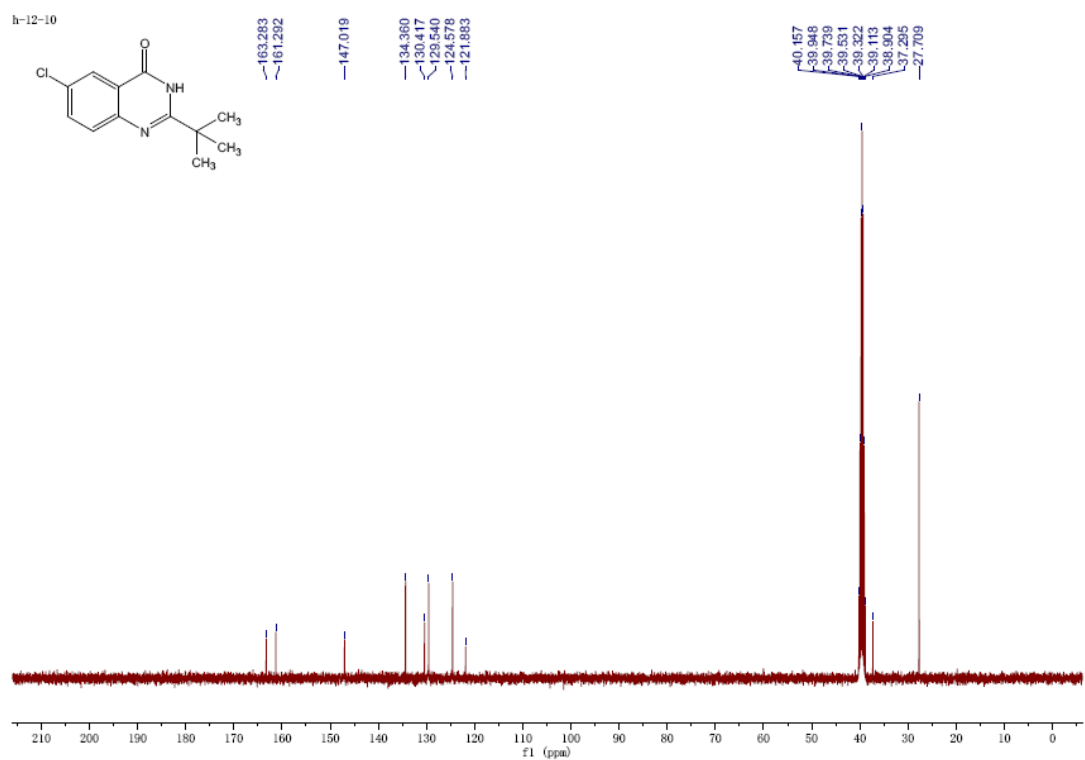

$^1\text{H}$  NMR and  $^{13}\text{C}$  NMR spectra of compound **3i**

OT何文  
H-12-30

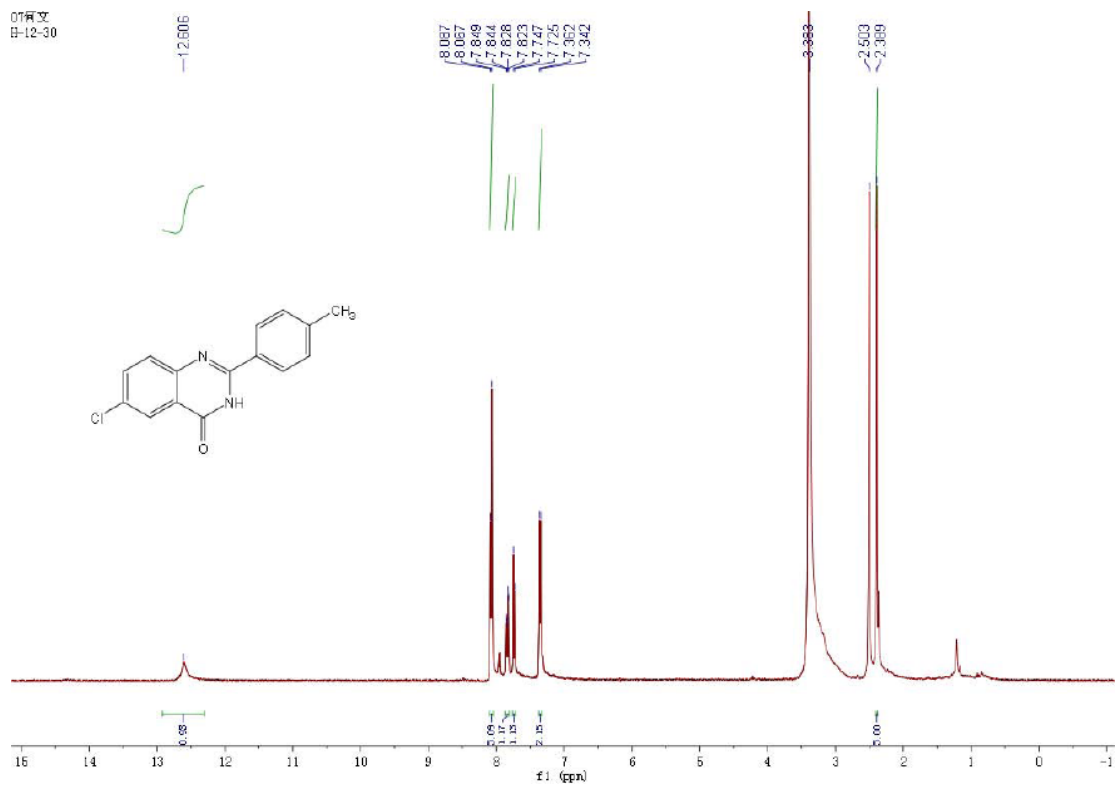

Desktop  
H-12-30

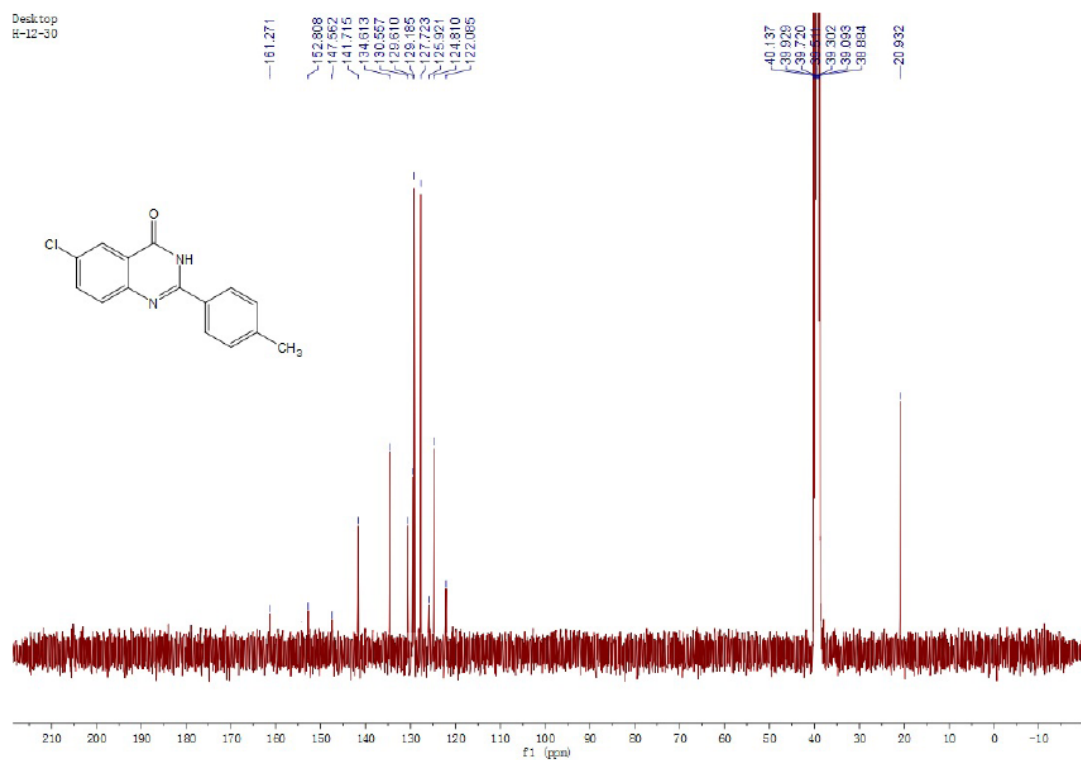

<sup>1</sup>H NMR and <sup>13</sup>C NMR spectra of compound **3j**

07何文  
H-12-16

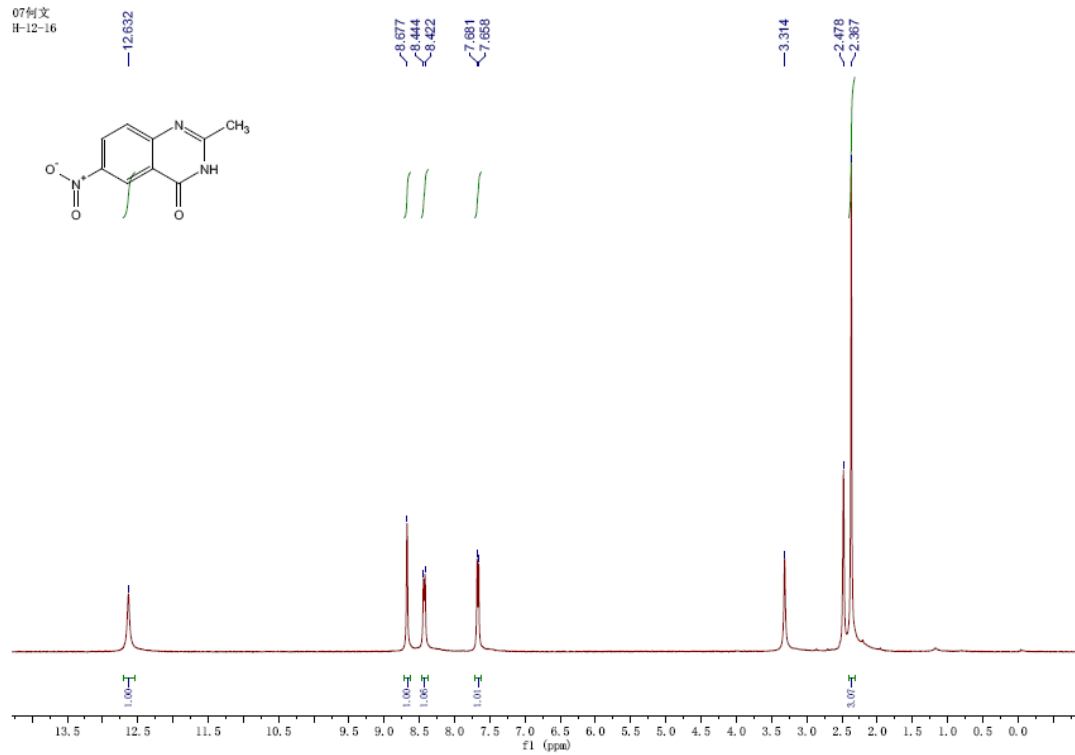

h-12-16

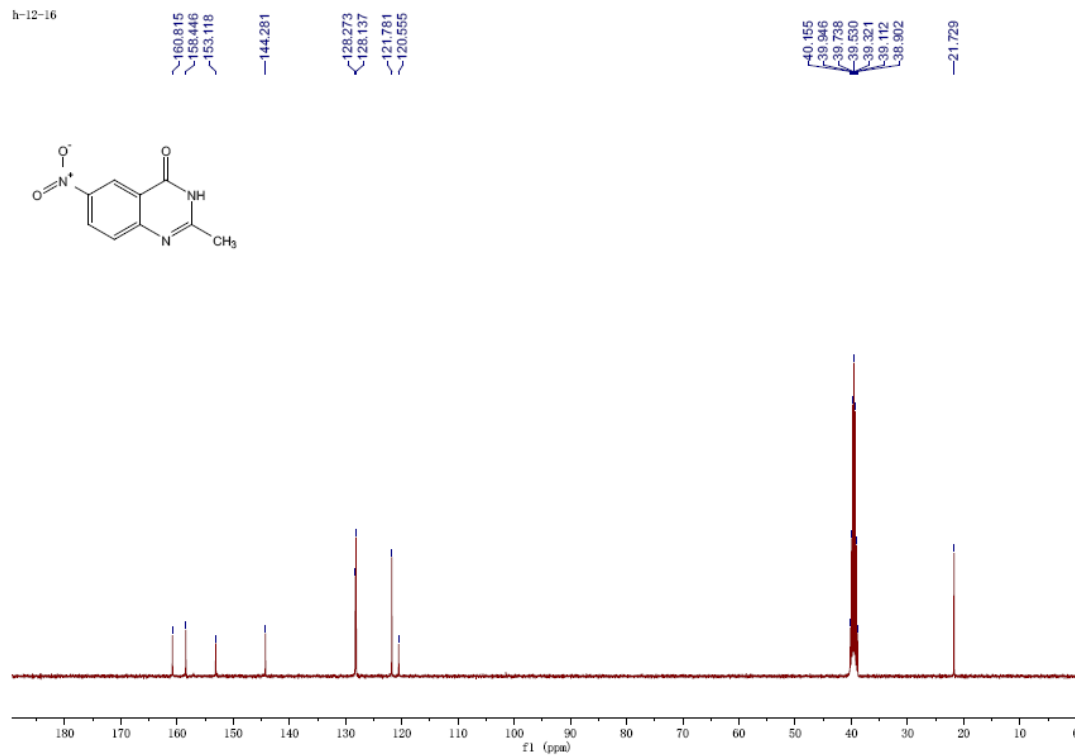

<sup>1</sup>H NMR and <sup>13</sup>C NMR spectra of compound 3k

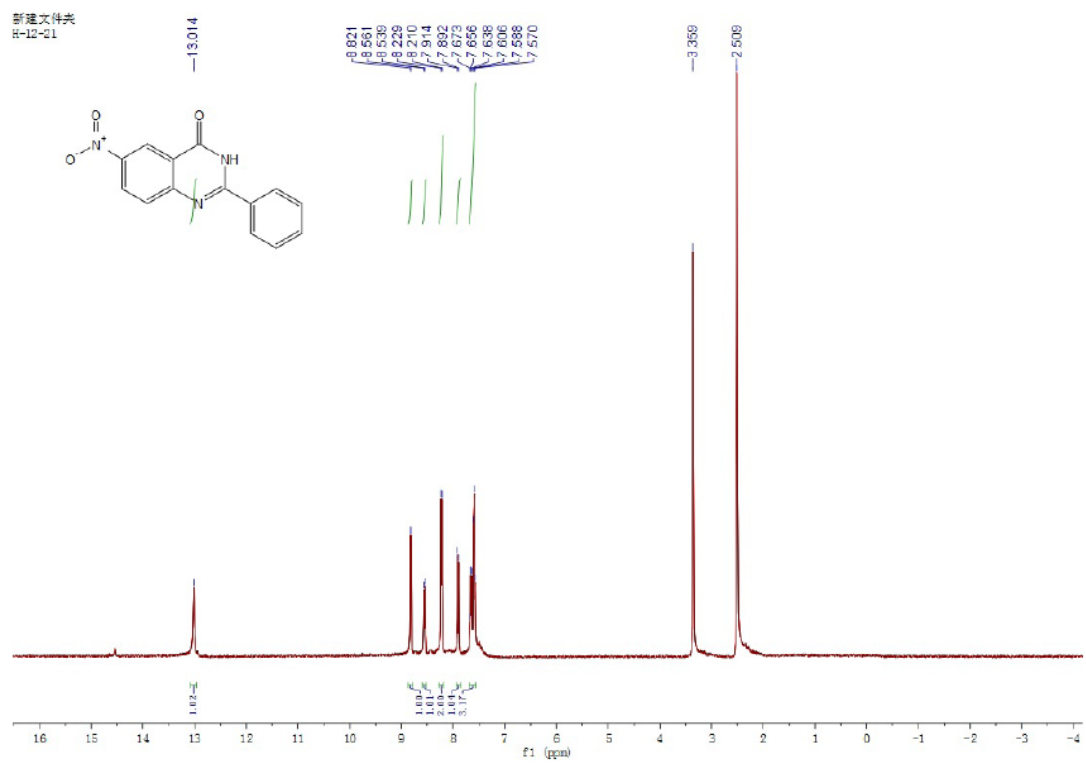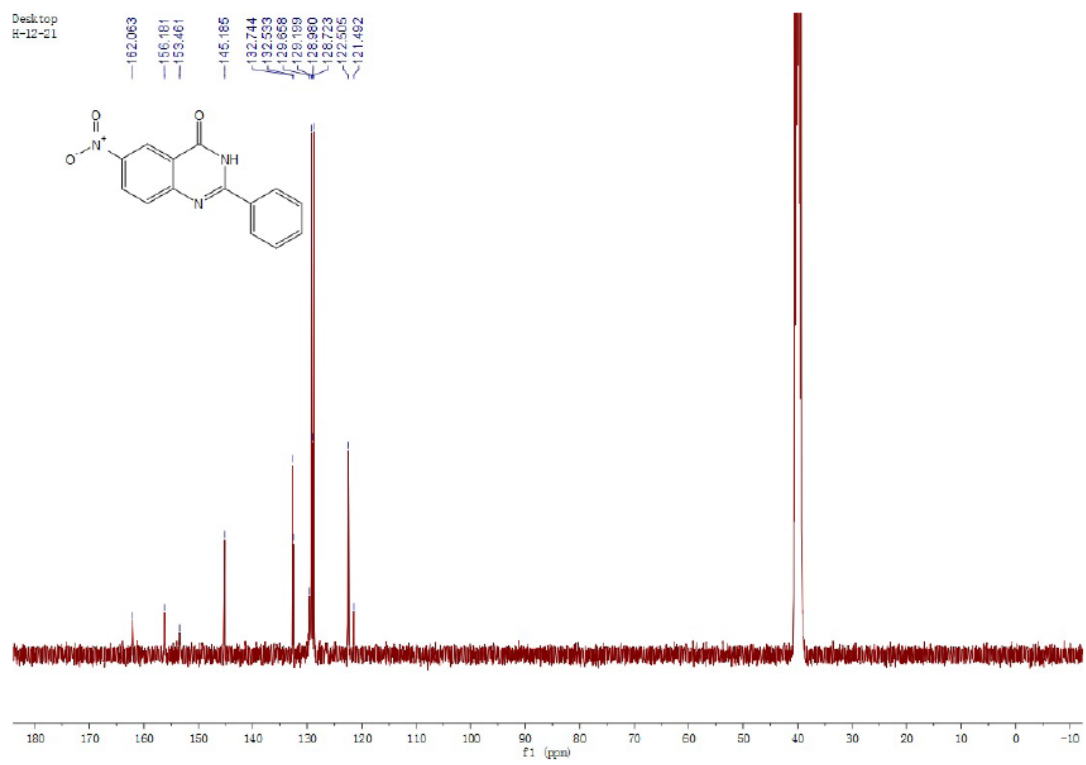

$^1\text{H}$  NMR and  $^{13}\text{C}$  NMR spectra of compound **31**

07何文  
H-12-20

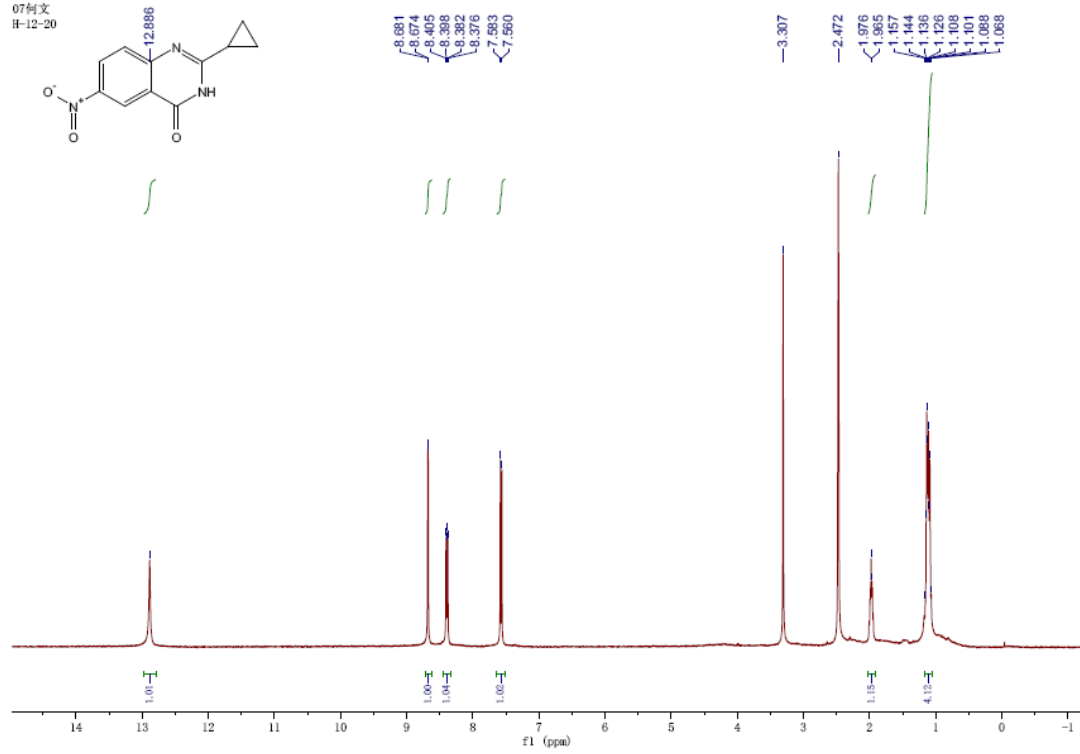

h-12-9

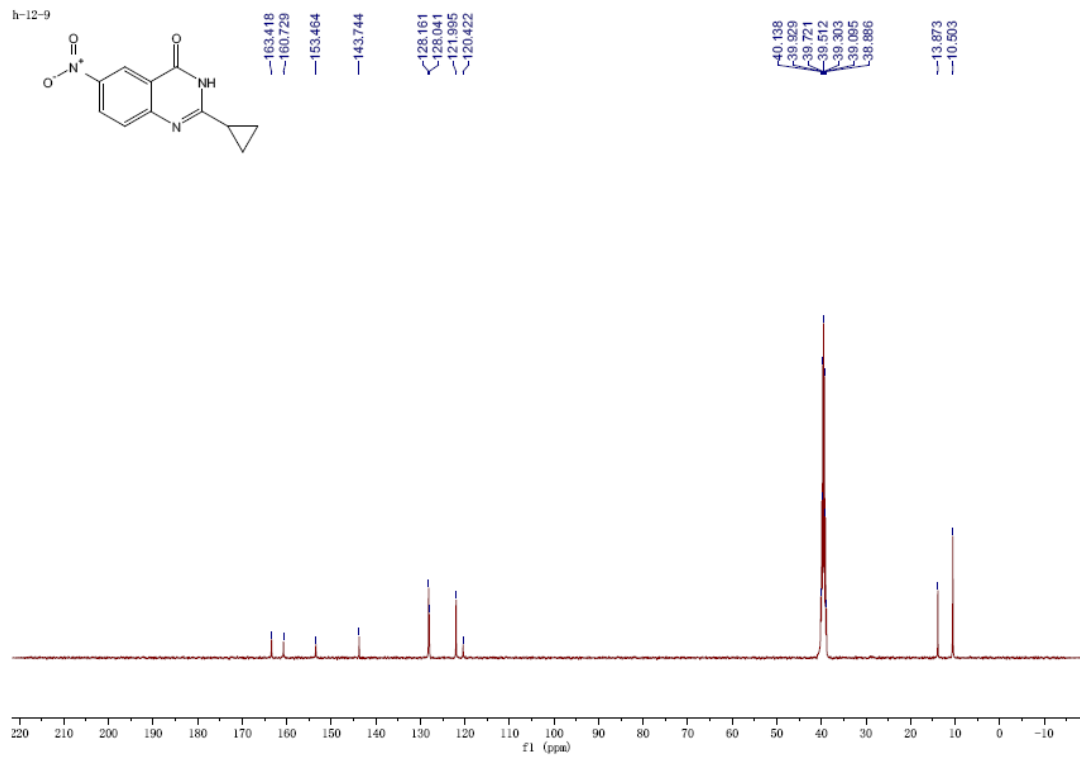

$^1\text{H}$  NMR and  $^{13}\text{C}$  NMR spectra of compound **3m**

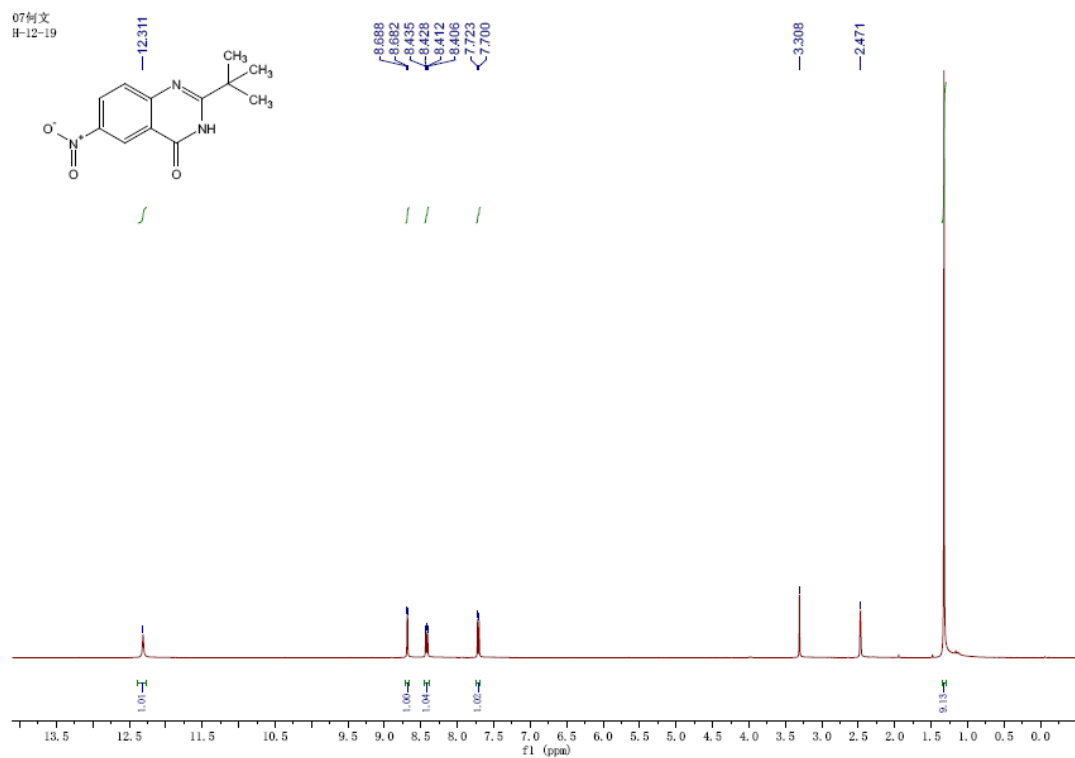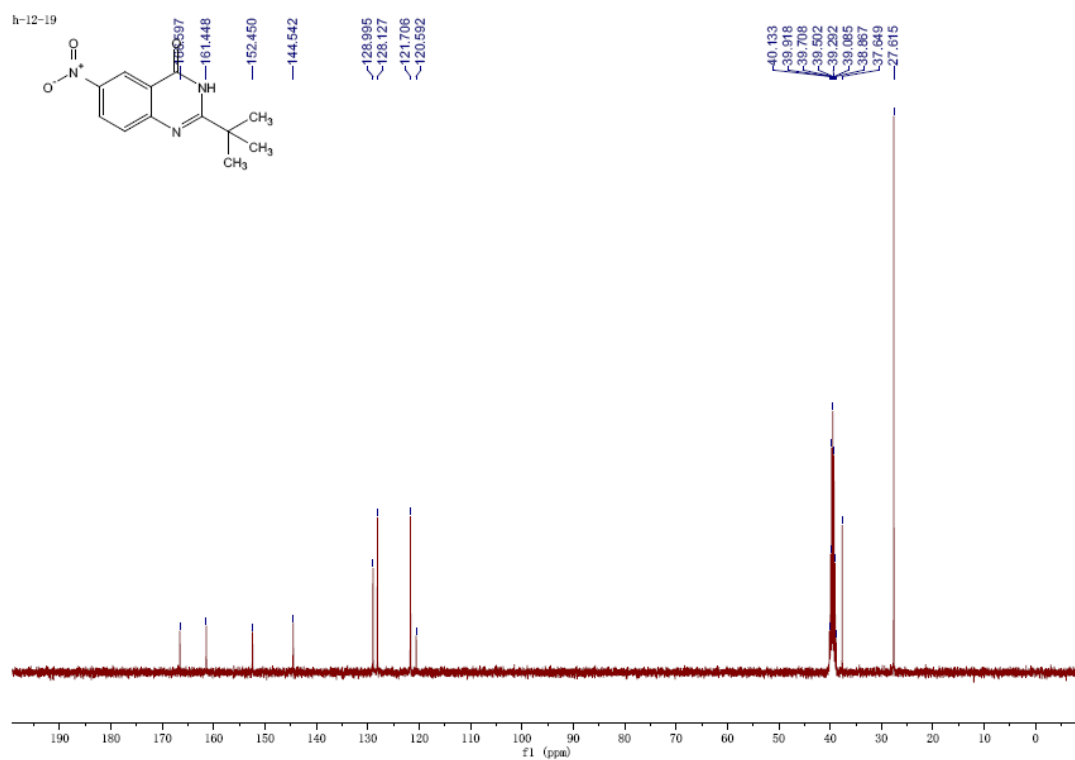

$^1\text{H}$  NMR and  $^{13}\text{C}$  NMR spectra of compound **3n**

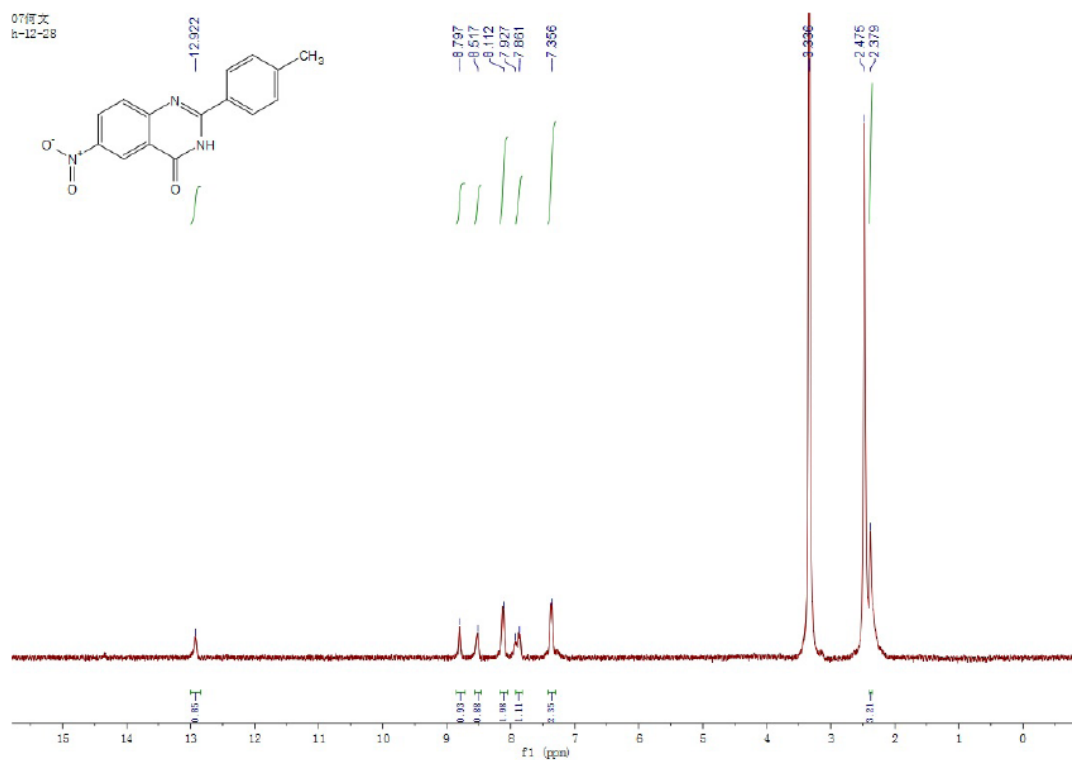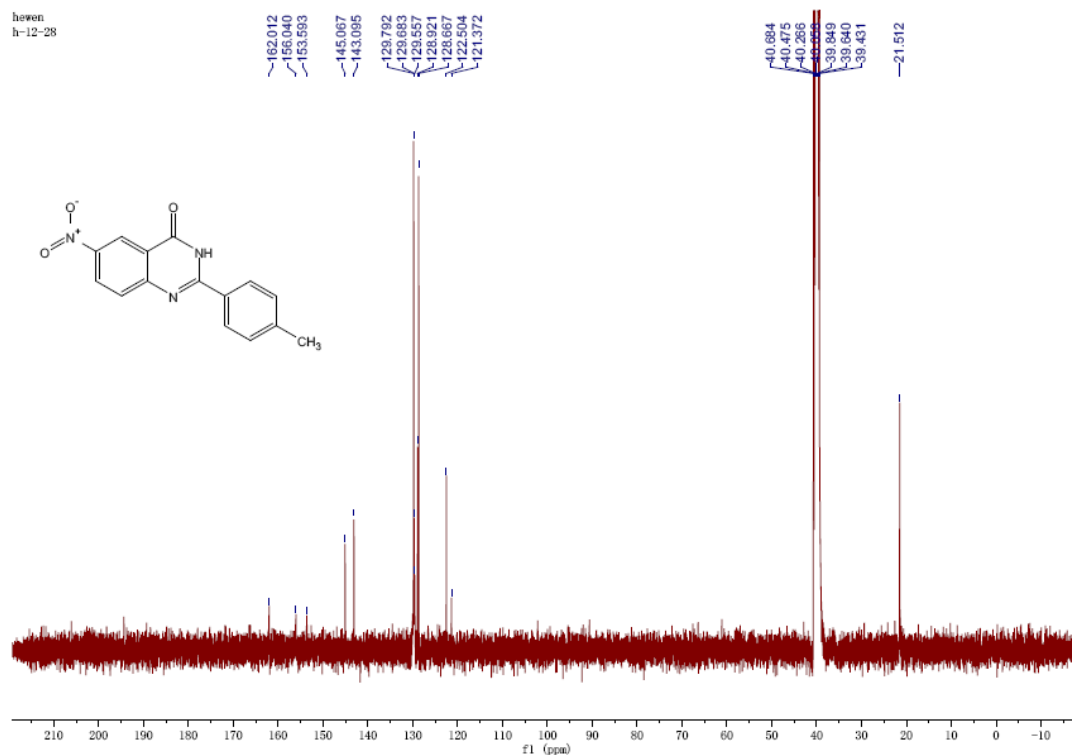

$^1\text{H}$  NMR and  $^{13}\text{C}$  NMR spectra of compound **30**

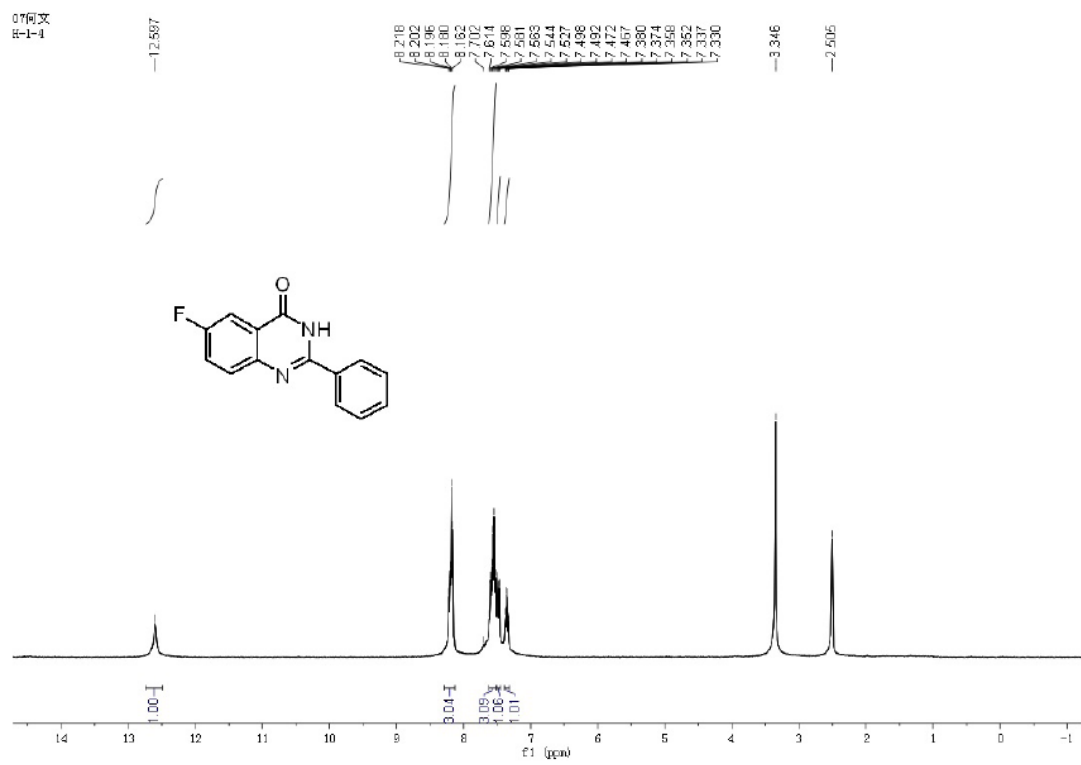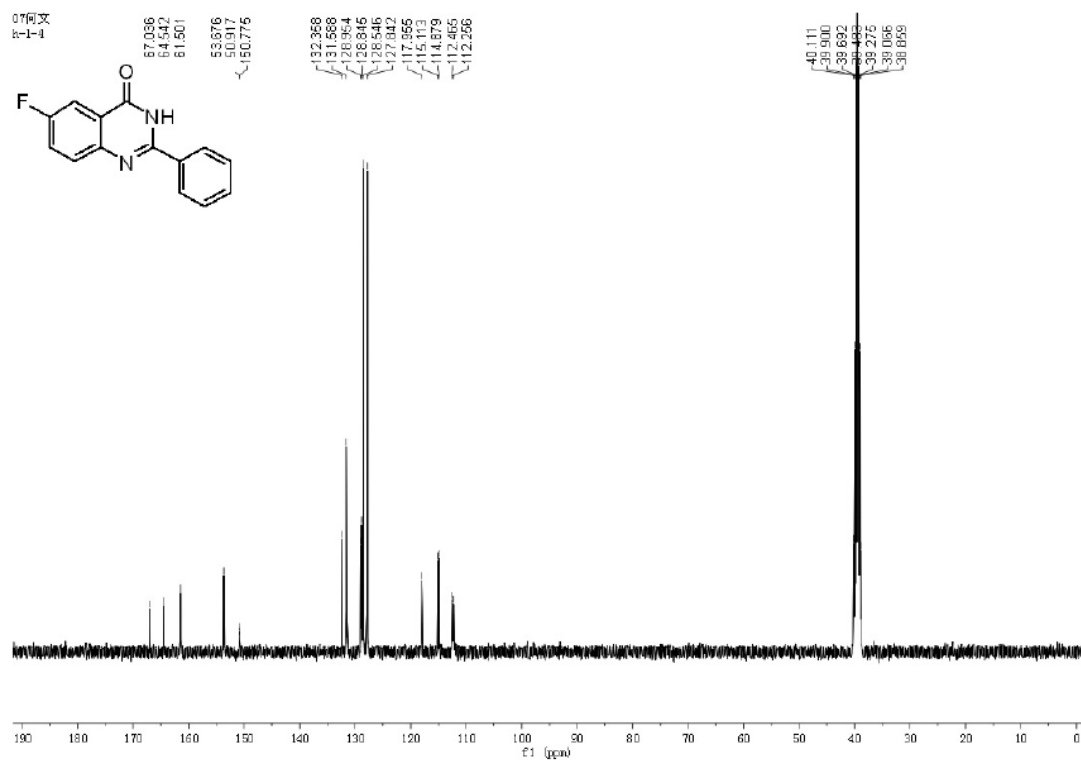

<sup>1</sup>H NMR and <sup>13</sup>C NMR spectra of compound 3p



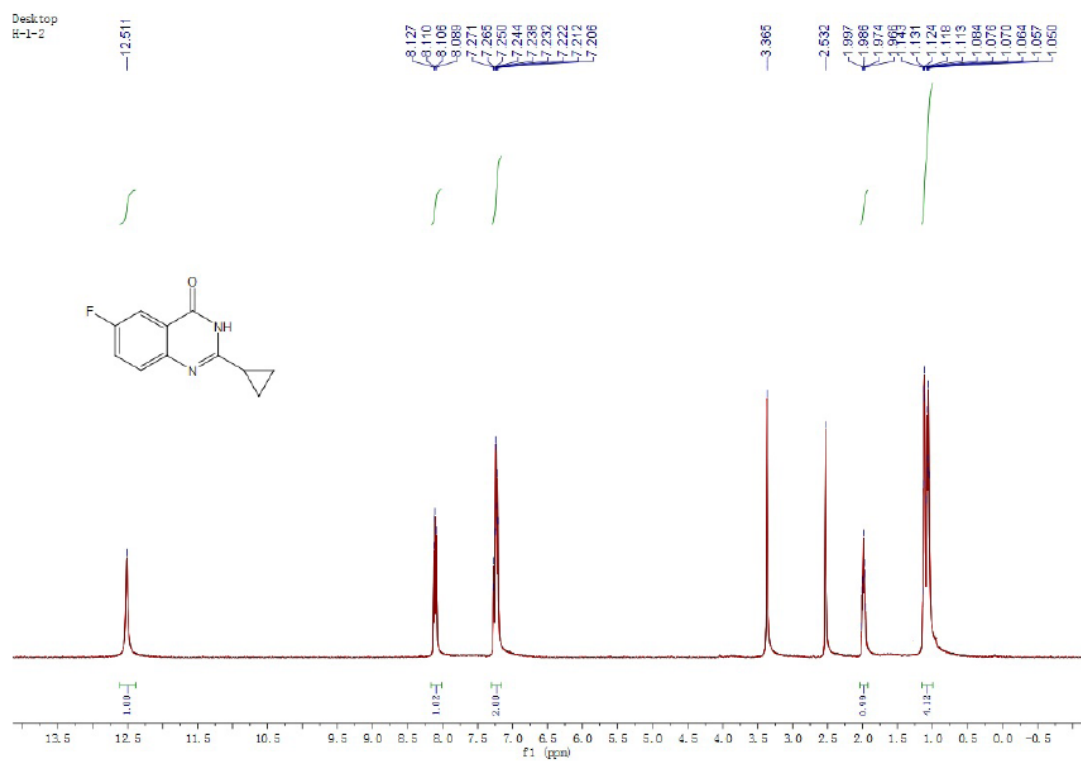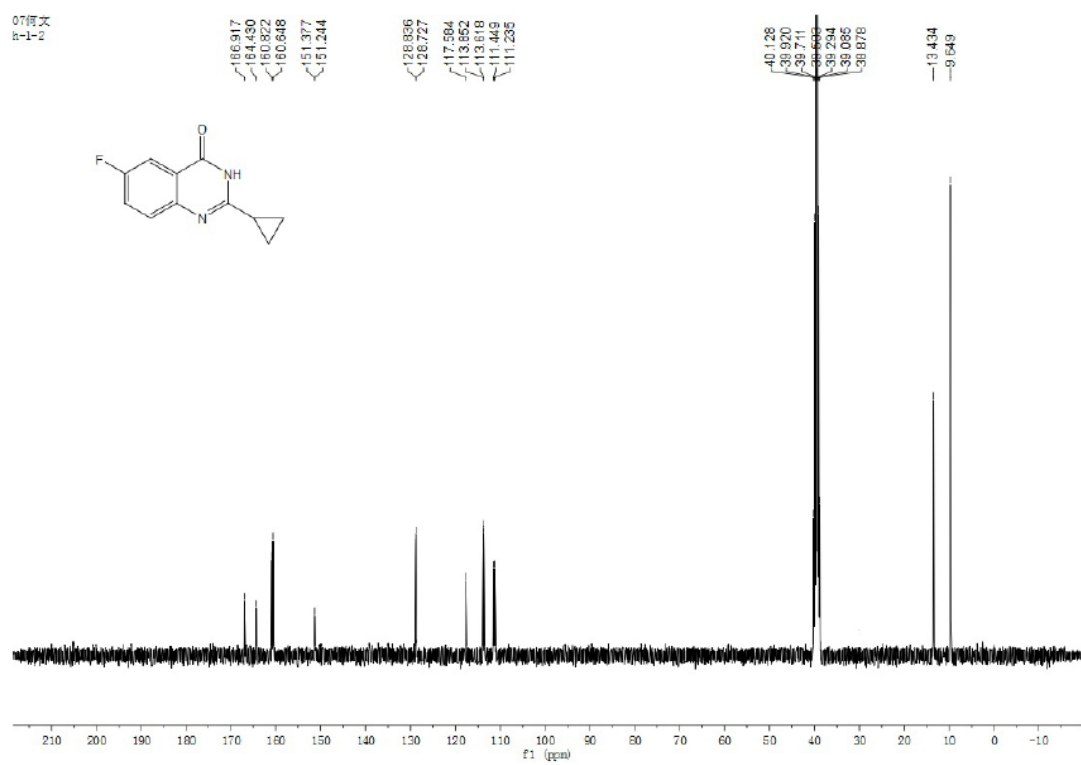

$^1\text{H}$  NMR and  $^{13}\text{C}$  NMR spectra of compound **3q**

07何文  
h-1-3

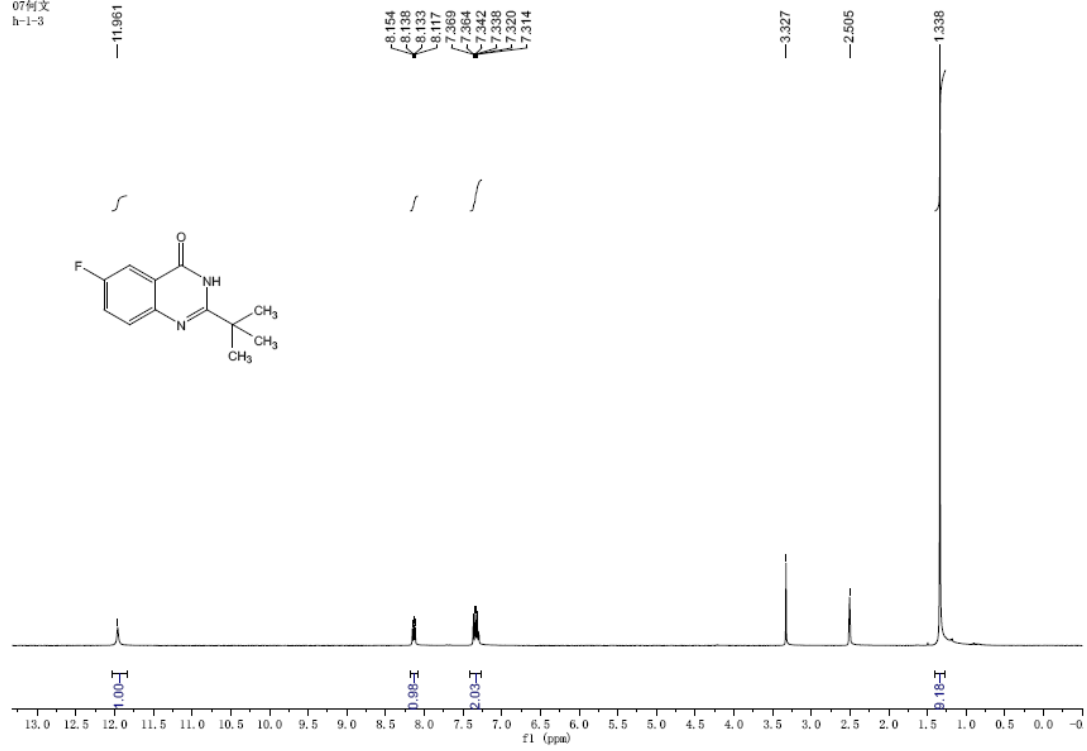

07何文  
h-1-3

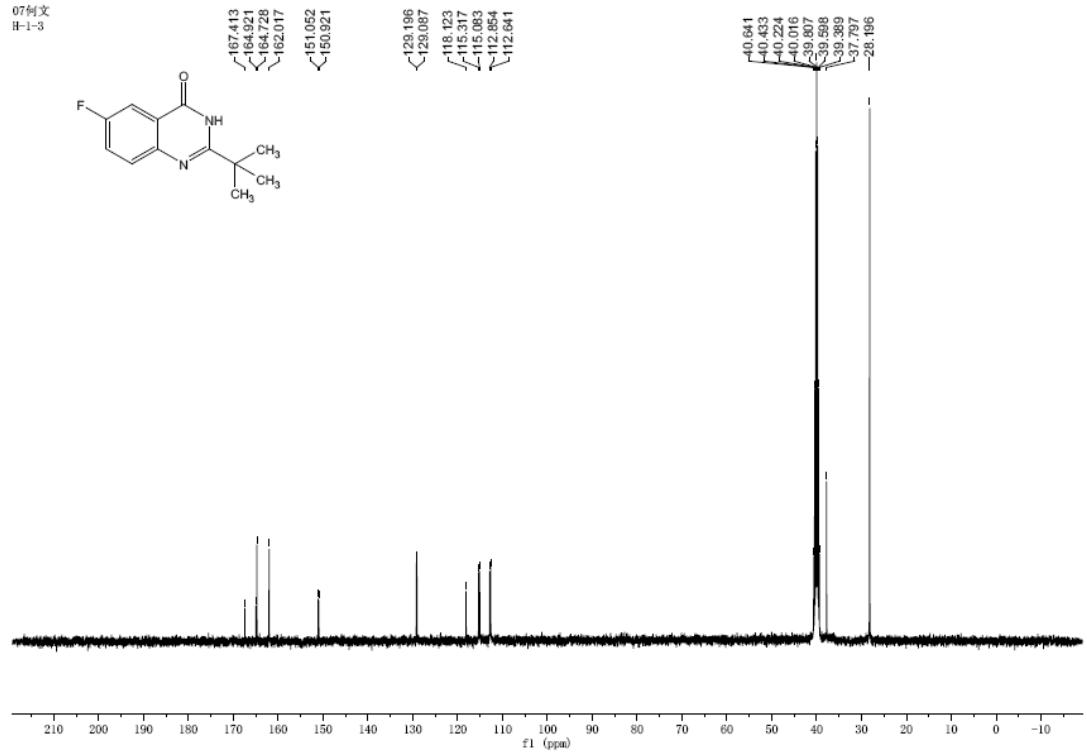

<sup>1</sup>H NMR and <sup>13</sup>C NMR spectra of compound **3r**

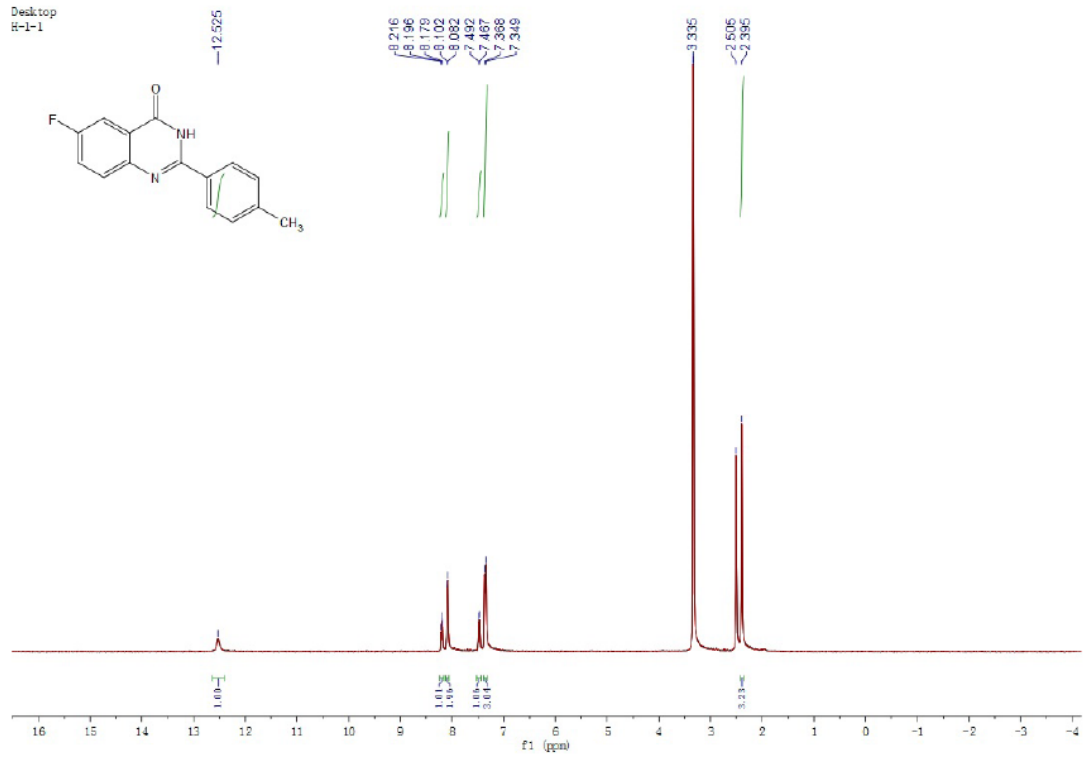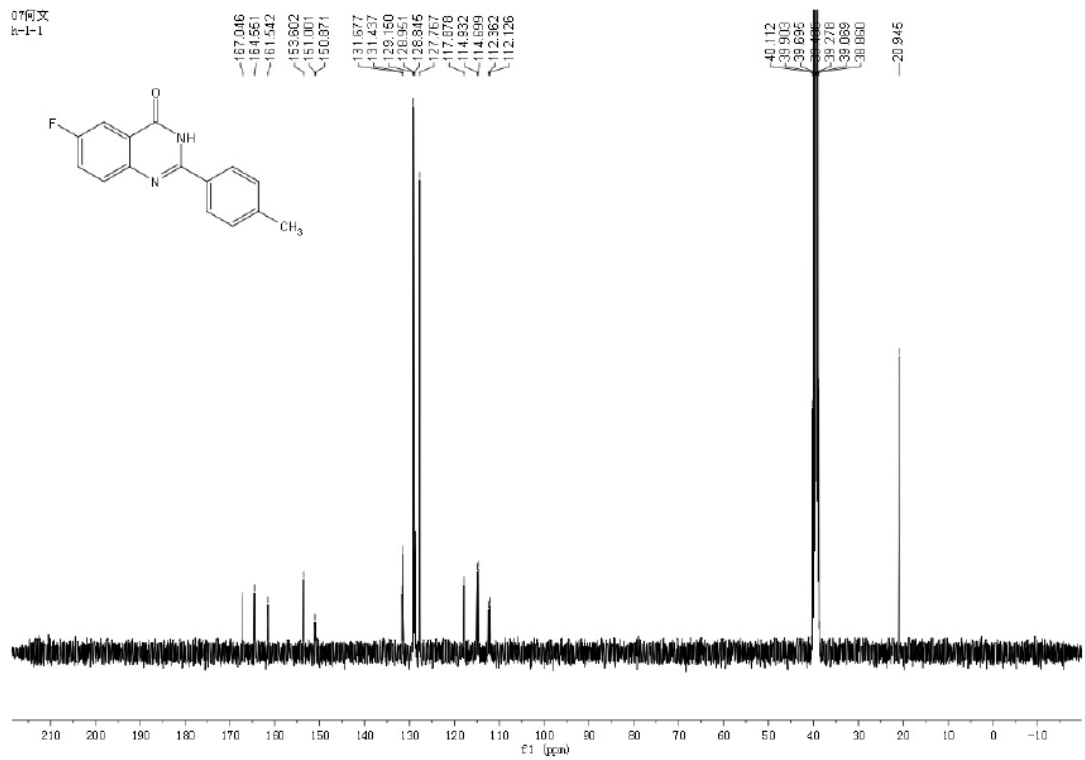

$^1\text{H}$  NMR and  $^{13}\text{C}$  NMR spectra of compound 3s

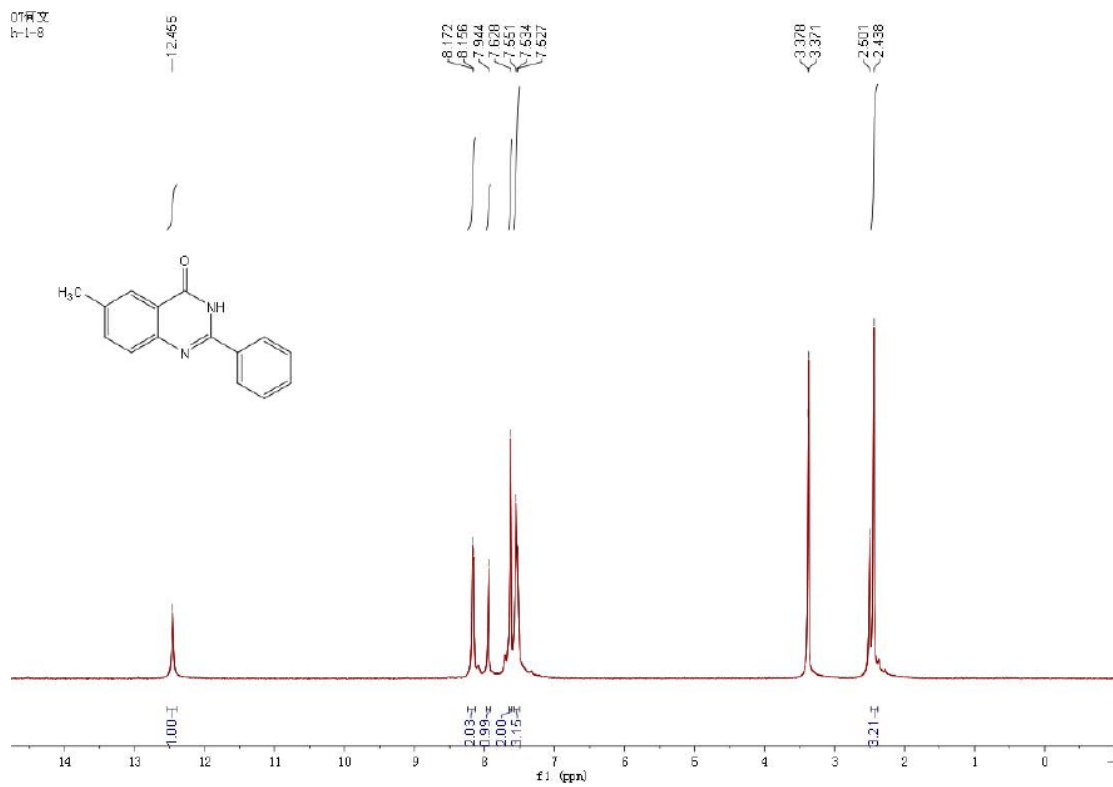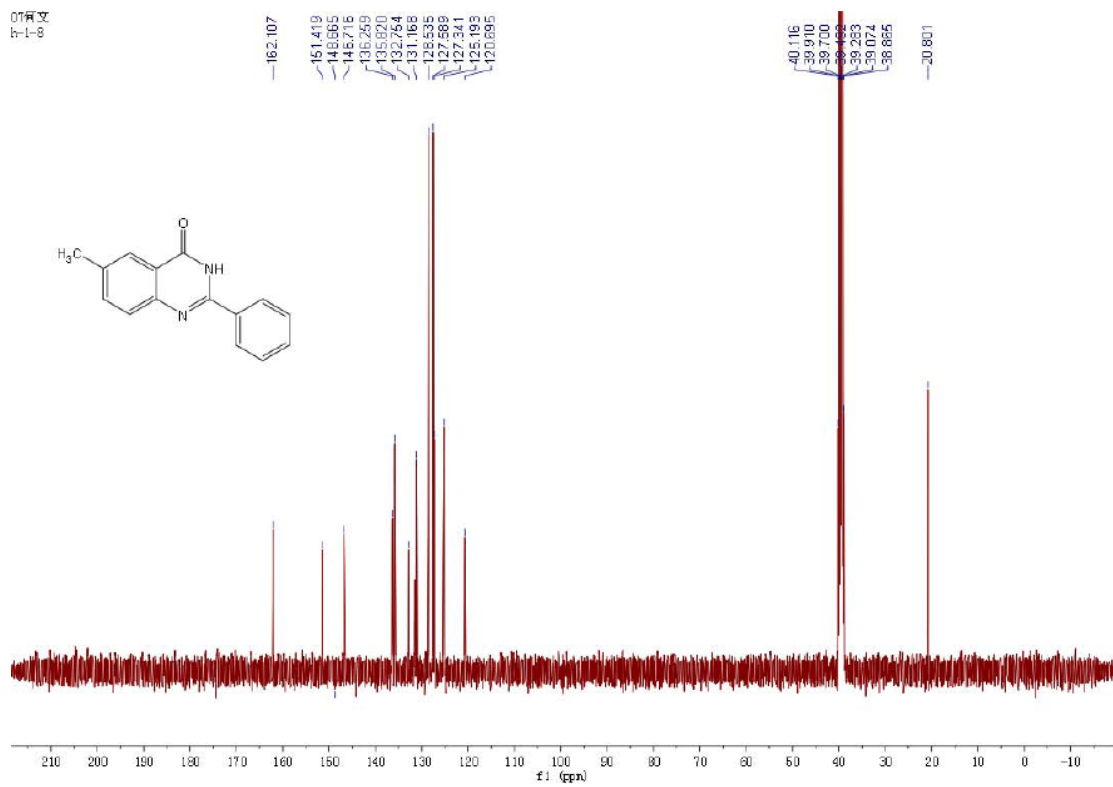

<sup>1</sup>H NMR and <sup>13</sup>C NMR spectra of compound 3t

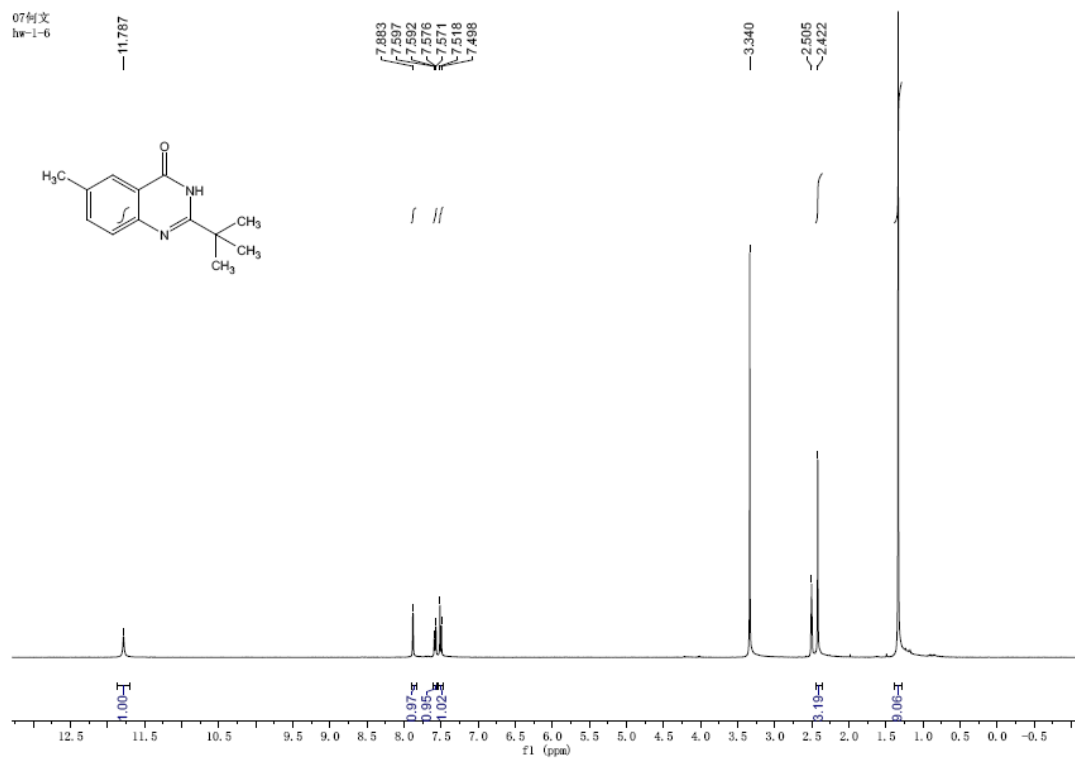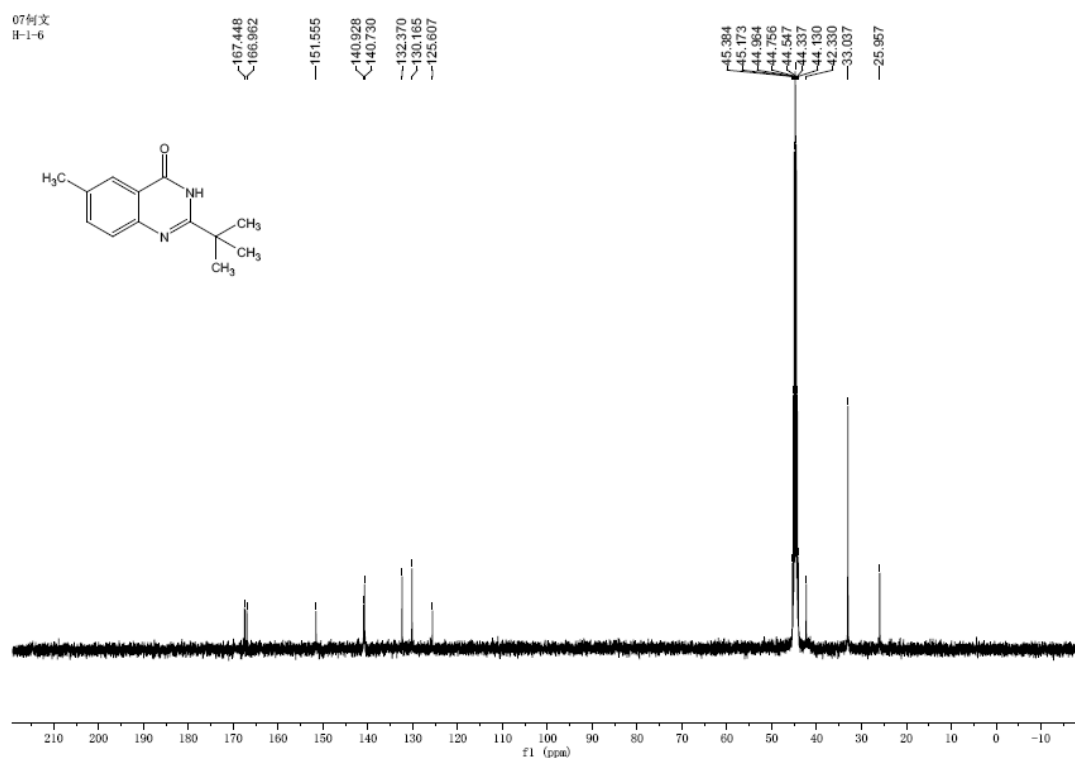

$^1\text{H}$  NMR and  $^{13}\text{C}$  NMR spectra of compound **3u**

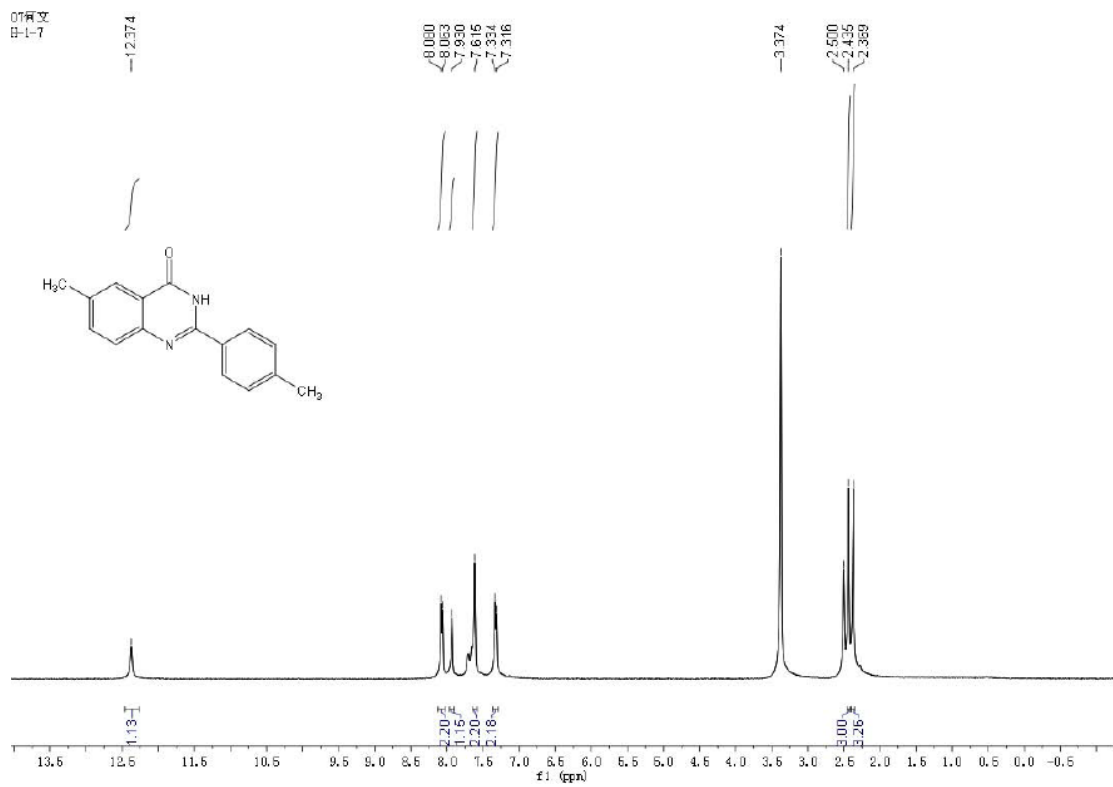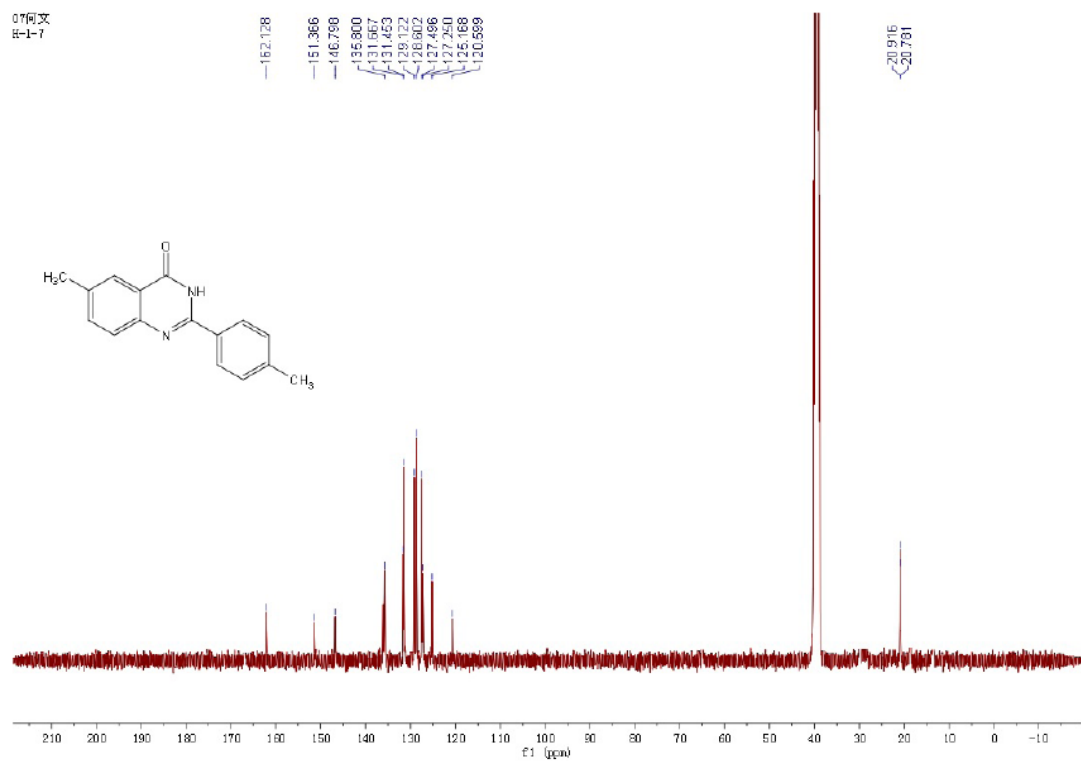

<sup>1</sup>H NMR and <sup>13</sup>C NMR spectra of compound 3v

07何文  
h-5-19-3

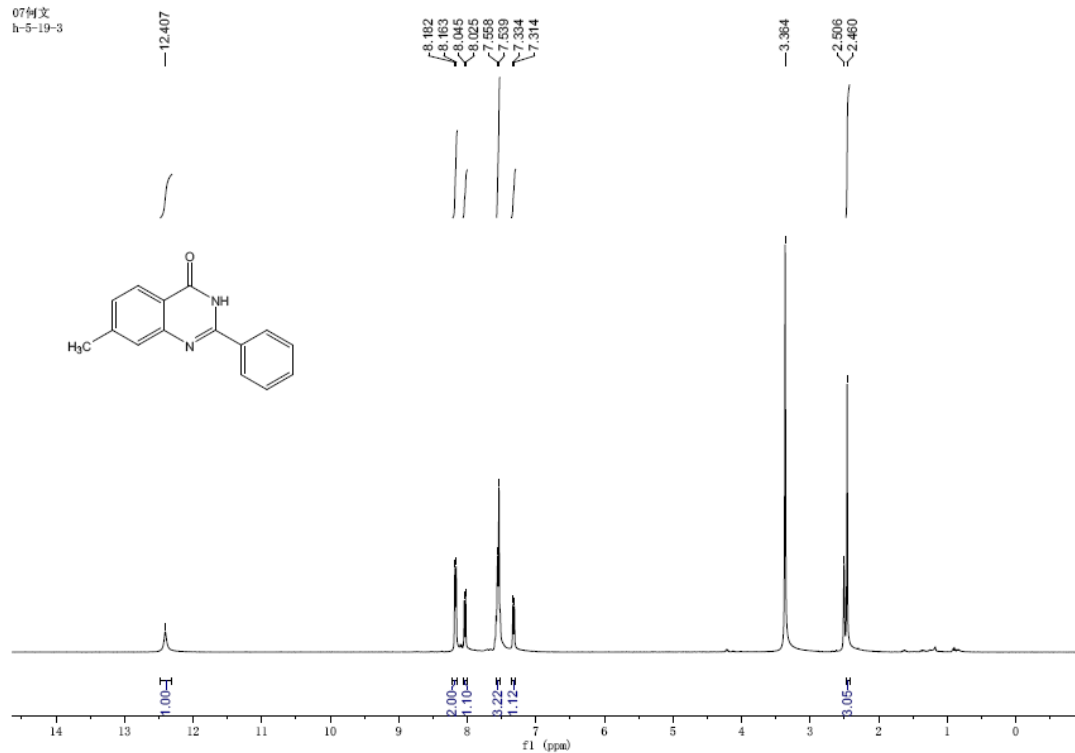

07何文  
H-5-19-3

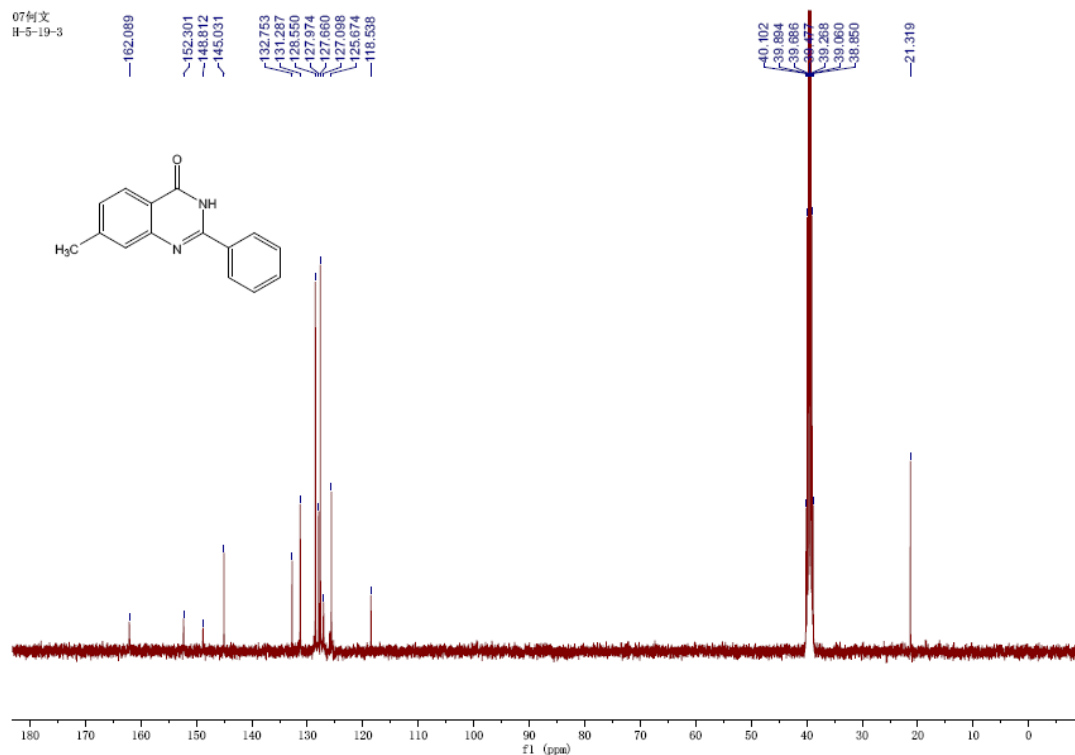

<sup>1</sup>H NMR and <sup>13</sup>C NMR spectra of compound **3w**

07何文  
H-5-19-2

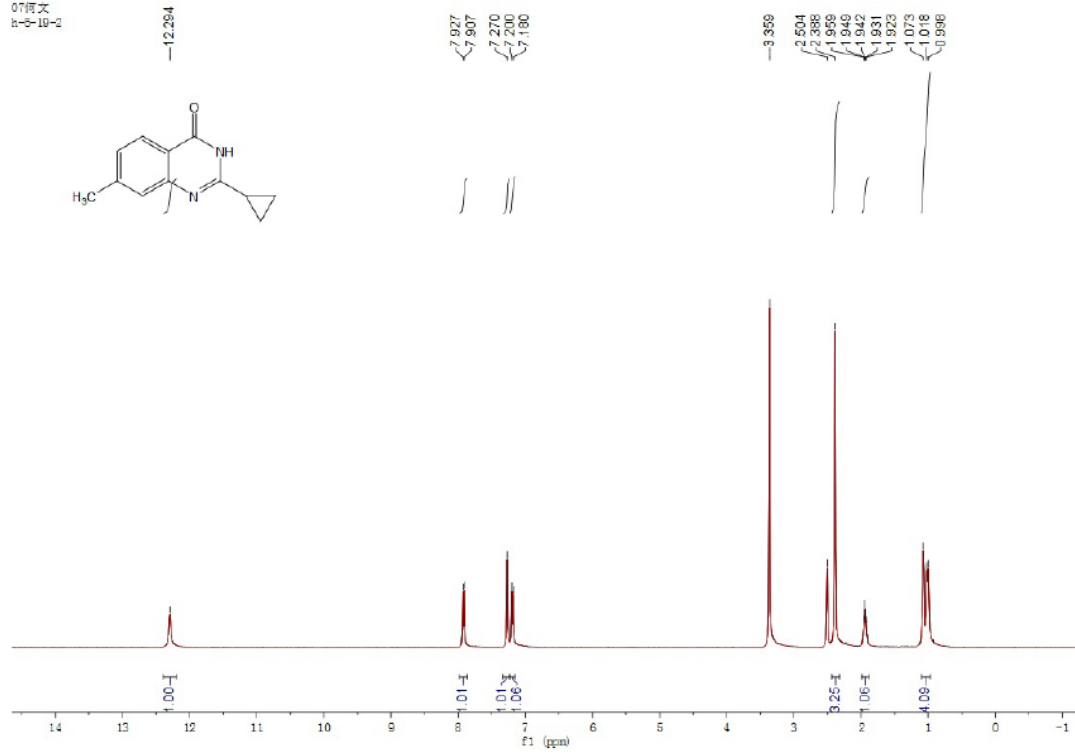

07何文  
H-5-19-2

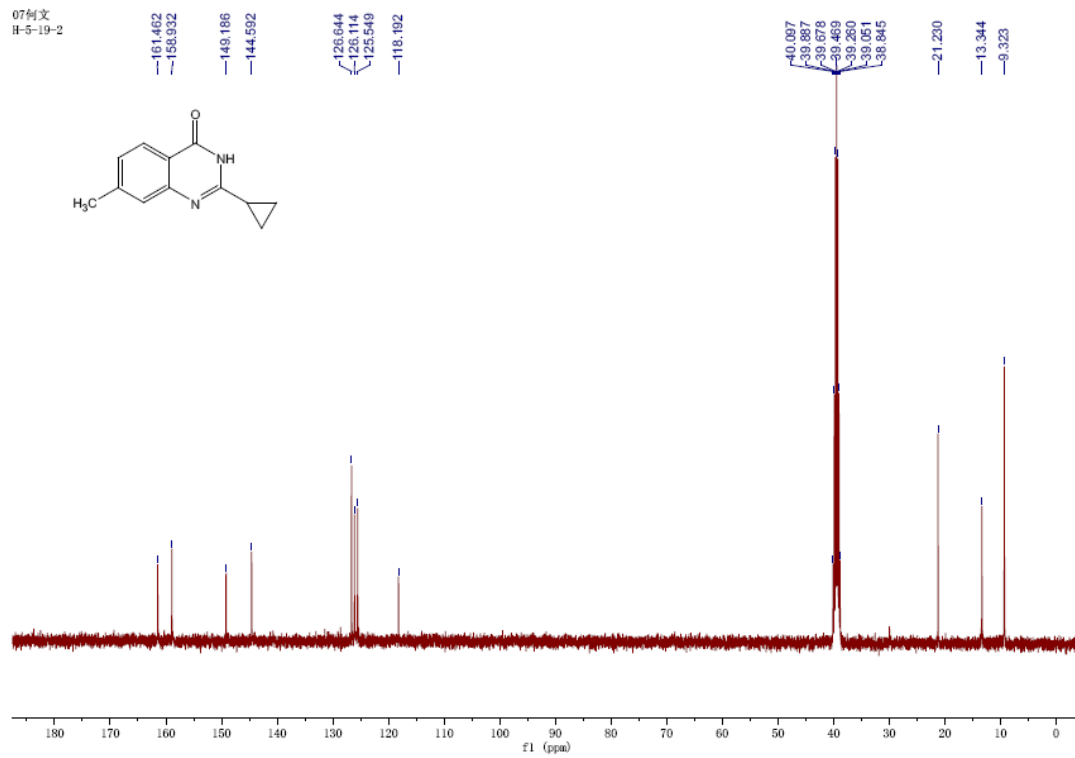

<sup>1</sup>H NMR and <sup>13</sup>C NMR spectra of compound 3x



07何文  
h-5-19-1

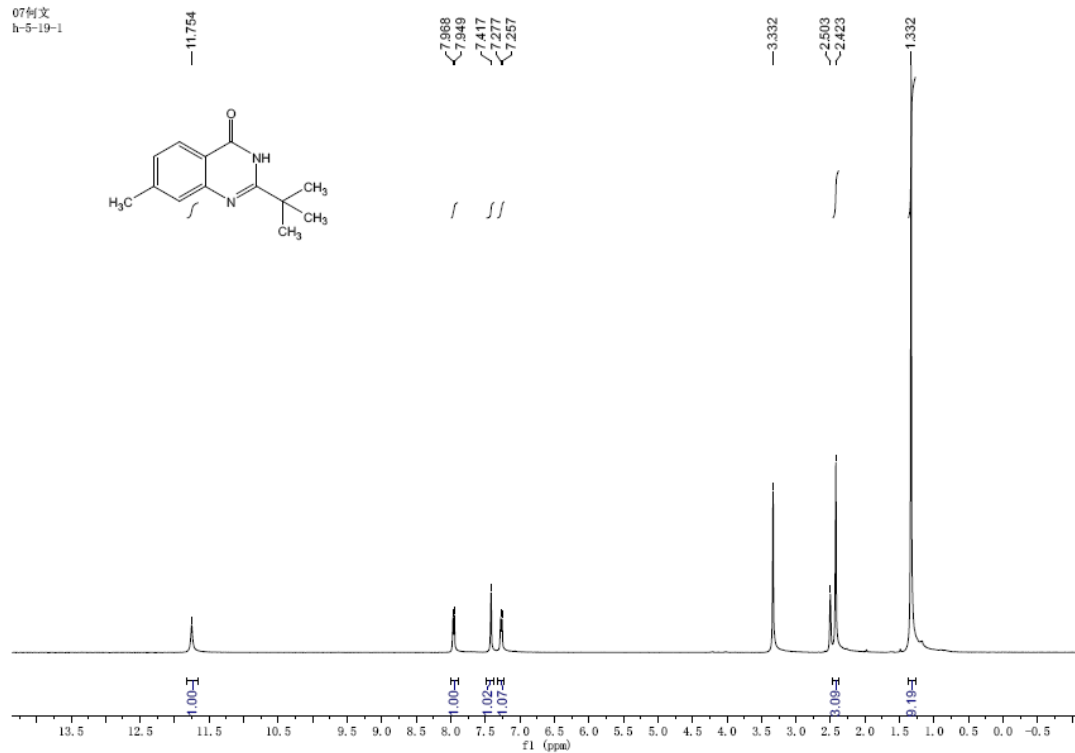

07何文  
H-5-19-1

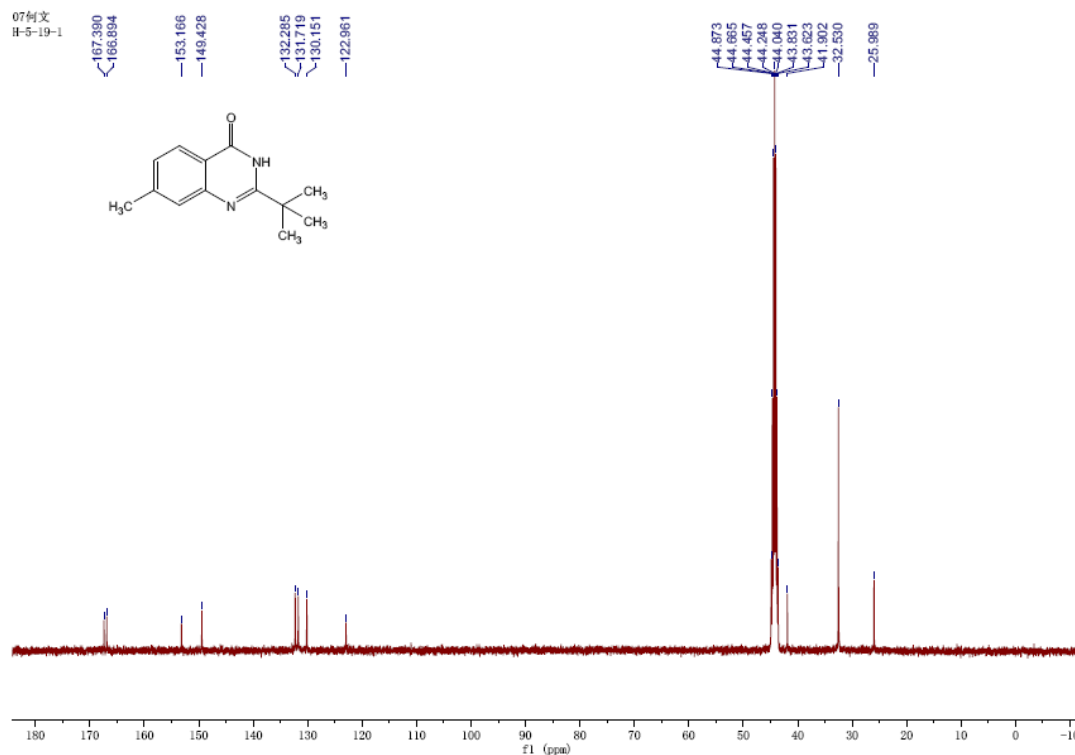

<sup>1</sup>H NMR and <sup>13</sup>C NMR spectra of compound **3y**
